# Supplementary material for: Gold(i)-catalysed alcohol additions to cyclopropenes
Source: Royal Society of Chemistry journal article supplement (doi:10.1039/c0ob00085j), 2010-01-01
Supplement: c0ob00085j.pdf [file c0ob00085j.pdf]

**Supporting information**

**Gold(I)-Catalysed Alcohol Addition to Cyclopropenes**

*Maximillian S. Hadfield, Jürgen T. Bauer, Pauline E. Glen and Ai-Lan Lee\**

School of Engineering and Physical Sciences, Chemistry - William H. Perkin Building,  
Heriot-Watt University, Edinburgh EH14 4AS, UK.

|                                                               |             |
|---------------------------------------------------------------|-------------|
| <b>Table of Contents</b>                                      | <b>S-2</b>  |
| <b>1. General Experimental Section</b>                        | <b>S-3</b>  |
| <b>2. Experimental Procedures</b>                             | <b>S-4</b>  |
| <b>3. <sup>1</sup>H-NMR Spectra of Synthesised Compounds</b>  | <b>S-33</b> |
| <b>4. <sup>13</sup>C-NMR Spectra of Synthesised Compounds</b> | <b>S-46</b> |
| <b>5. References</b>                                          | <b>S-59</b> |

## 1. General Experimental Section

<sup>1</sup>H NMR spectra were recorded on Bruker AC 200, DPX 400 and AV 400 spectrometers at 200 and 400 MHz respectively and referenced to residual solvent. <sup>13</sup>C NMR spectra were recorded at 50 and 100 MHz on the same spectrometers. Chemical shift data are quoted in parts per million ( $\delta$  in ppm), *J* values are given in Hz and s, d, dd, t, q and m represent singlet, doublet, doublet of doublet, triplet, quartet and multiplet. Mass spectra were obtained at the EPSRC National Mass Spectrometry Service Centre in Swansea. Infrared spectra were obtained on Perkin-Elmer Spectrum 100 FT-IR Universal ATR Sampling Accessory, deposited neat or as a chloroform solution to a diamond/ZnSe plate. Br, s, m, w and vw represent broad, strong, medium, weak and very weak respectively. Flash column chromatography was carried out using Matrix silica gel 60 from Fisher Chemicals and TLC was performed using Merck silica gel 60 F254 pre-coated sheets and visualised by UV (254 nm) or stained by the use of aqueous acidic KMnO<sub>4</sub> or aqueous acidic ammonium molybdate as appropriate. Chemicals were purchased from Aldrich and Fisher chemical companies and used without further purification unless otherwise stated. Tetrahydrofuran was dried by distillation from sodium – benzophenone under nitrogen. Dichloromethane stored over 4 Å molecular sieves and all alcohol nucleophiles were used as purchased. Petrol ether refers to petroleum ether (40 – 60 %).

## 2. Experimental Procedures

Cyclopropenes **1**, **6**, **4**, **9**, **11** and **14** were synthesized following a general procedure by Gevorgyan (Scheme 1).<sup>1-2</sup>

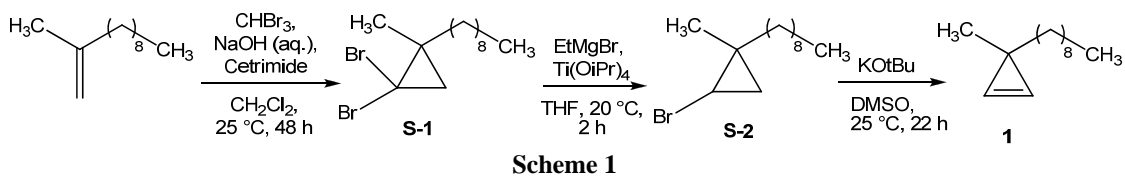

### 1,1-Dibromo-2-methyl-2-nonylcyclopropane S-1<sup>3</sup>

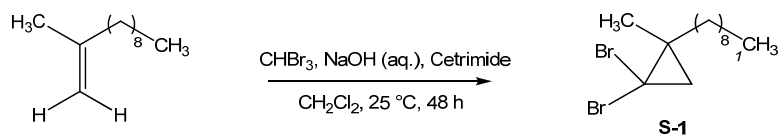

Bromoform (30.9 g, 122 mmol) and dichloromethane (5 mL) were added dropwise to a stirring mixture of aqueous sodium hydroxide (30 mL, 11.2 g, 280 mmol), cetrimide (2.52 g), 2-methylundec-1-ene (10.3 g, 61.2 mmol) and dichloromethane (10 mL). The mixture was allowed to stir at 25 °C. After 48 h, the reaction mixture was diluted with water (75 mL). Dichloromethane (30 mL) was added and the layers partitioned. The aqueous layer was washed twice with dichloromethane (30 mL). The combined organic layers were washed with brine (50 mL), dried over magnesium sulphate and concentrated under reduced pressure. The resulting material was purified by flash column chromatography (hexanes) and the remaining bromoform was evaporated under high vacuum (10 h, 30 °C) to yield 1,1-dibromo-2-methyl-2-nonylcyclopropane **S-1** (16.8 g, 49.5 mmol, 81%) as a colourless oil.

$\nu_{\max}/\text{cm}^{-1}$  689 s (Br-C);  $\delta_{\text{H}}$  (200 MHz,  $\text{CDCl}_3$ ) 1.67 – 1.18 (21H, m, alkyl-H), 0.88 (3H, t,  $J = 6.6$ , H-1);  $\delta_{\text{C}}$  (50 MHz,  $\text{CDCl}_3$ ) 39.9 (C), 38.8 ( $\text{CH}_2$ ), 34.8 ( $\text{CH}_2$ ), 31.8 ( $\text{CH}_2$ ), 29.7 (C), 29.6 ( $\text{CH}_2$ ), 29.5 ( $\text{CH}_2$ ), 29.3 ( $\text{CH}_2$ ), 26.4 ( $\text{CH}_2$ ), 22.7 ( $\text{CH}_2$ ), 22.5 ( $\text{CH}_3$ ), 14.1 ( $\text{CH}_3$ );  $M^+(\text{EI}) = 338.0245$  required  $M = 338.0245$ .

### 2-Bromo-1-methyl-1-nonylcyclopropane **S-2**<sup>3</sup>

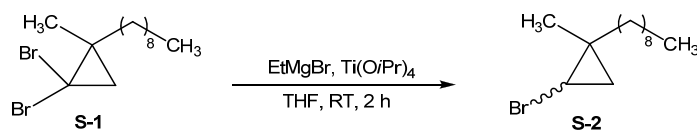

A solution of ethylmagnesium bromide (1.38 M in Et<sub>2</sub>O, 38.6 mL, 53.3 mmol) was added over 1 hour to a stirring solution of 1,1-dibromo-2-methyl-2-nonylcyclopropane **S-1** (14.1 g, 41.5 mmol), Ti(OiPr)<sub>4</sub> (0.235 g, 0.827 mmol) and tetrahydrofuran (100 mL). The solution was allowed to stir for an additional hour at 20 °C. The reaction was quenched by slow addition of water (20 mL), then 20% aqueous sulphuric acid (50 mL) was added and the mixture stirred for 30 minutes. Diethyl ether (50 mL) was added and the layers were partitioned. The aqueous layer was washed further three times with diethyl ether (50 mL). The combined organic layers were washed twice with saturated sodium bicarbonate (50 mL), washed with brine (50 mL), dried over magnesium sulphate and concentrated under reduced pressure. The crude material was purified by flash column chromatography (eluent: petrol ether) to yield a mixture of the two diastereomers of 2-bromo-1-methyl-1-nonylcyclopropane **S-2** (8.25 g, 31.6 mmol, 77%) as a colourless oil.

$\delta_{\text{H}}$  (200 MHz, CDCl<sub>3</sub>) 2.82 (1H x 2, m, CHBr), 1.55 – 0.82 (22H x 2, m, alkyl-H), 0.62 (2H x 2, m, CHBrCH<sub>2</sub>);  $\delta_{\text{C}}$  (50 MHz, CDCl<sub>3</sub>) 38.9 (CH<sub>2</sub>), 36.4 (CH<sub>2</sub>), 31.9 (CH<sub>2</sub>), 30.7 (CH<sub>2</sub>), 30.1 (CH), 29.8 (CH), 29.7 (CH<sub>2</sub>), 29.6 (CH<sub>2</sub>), 29.5 (CH<sub>2</sub>), 29.3 (CH<sub>2</sub>), 26.5 (CH<sub>2</sub>), 26.3 (CH<sub>2</sub>), 22.8 (CH<sub>2</sub>), 22.7 (CH<sub>2</sub>), 22.5 (CH<sub>2</sub>), 22.1 (CH<sub>3</sub>), 21.3 (C), 21.0 (C), 20.2 (CH<sub>3</sub>), 14.1 (CH<sub>3</sub>);  $M^+$ (EI) = 260.1121 required  $M = 260.1140$ .

### 3-Methyl-3-nonylcycloprop-1-ene **1**<sup>3</sup>

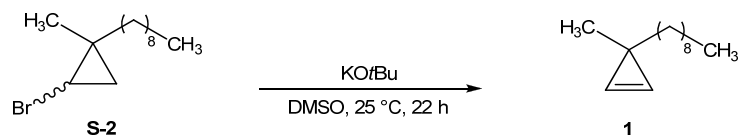

Potassium *tert*-butoxide (12.21 g, 109.0 mmol) and dimethyl sulfoxide (168 mL) were heated to 50 °C and allowed to stir for 30 minutes at this temperature. The solution was cooled to room temperature and 2-bromo-1-methyl-1-nonylcyclopropane **S-2** (14.36 g, 55.0 mmol) was added dropwise over 3 hours. The reaction mixture was allowed to stir for 22 h at 25 °C, then quenched by addition of water (200 mL). Pentane (200 mL) was added and the layers partitioned. The aqueous layer was washed three times with pentane (200 mL). The combined organic layers were washed twice with brine (300 mL), dried over magnesium sulphate and concentrated under reduced pressure. The resulting material was purified by flash column chromatography (pentane) to yield 3-methyl-3-nonylcycloprop-1-ene **1** (9.20 g, 51.1 mmol, 93%) as a colourless oil.

$\nu_{\text{max}}/\text{cm}^{-1}$  1628 vw (C=C);  $\delta_{\text{H}}$  (200 MHz,  $\text{CDCl}_3$ ) 7.34 (2H, s, C=CH), 1.54 – 1.03 (19H, m, alkyl-H), 0.88 (3H, t,  $J = 6.4$ ,  $\text{CH}_2\text{CH}_3$ );  $\delta_{\text{C}}$  (50 MHz,  $\text{CDCl}_3$ ) 122.1 (CH), 40.2 ( $\text{CH}_2$ ), 31.9 ( $\text{CH}_2$ ), 29.8 ( $\text{CH}_2$ ), 29.6 ( $\text{CH}_2$ ), 29.6 (C), 29.4 ( $\text{CH}_2$ ), 27.3 ( $\text{CH}_3$ ), 27.1 ( $\text{CH}_2$ ), 22.7 ( $\text{CH}_2$ ), 14.1 ( $\text{CH}_3$ );  $M^+(\text{EI}) = 180.1897$  required  $M = 180.1878$ .

### ((2,2-Dibromo-1-methylcyclopropyl)methyl)benzene **S-3**

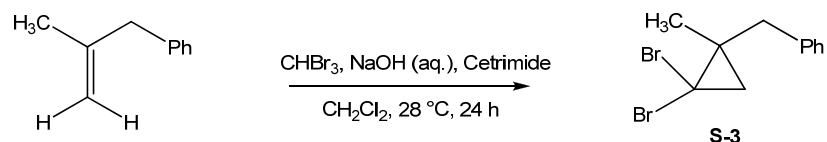

A solution of 10 M aqueous sodium hydroxide (29 mL) was added to a flask charged with cetrimide (2.80 g). A solution of 2-(2-methylallyl)benzene (10.0 g, 75.6 mmol) in dichloromethane (10 mL) was added to the stirring mixture. Bromoform (38.2 g, 151 mmol) in dichloromethane (7 mL) was added dropwise over a period of 3 hours. The mixture was allowed to stir vigorously at  $28\text{ }^\circ\text{C}$ . After 24 h, the reaction mixture was diluted with water (100 mL). Dichloromethane (30 mL) was added and the layers partitioned. The aqueous layer was washed twice with dichloromethane (30 mL). The combined organic layers were washed with brine (50 mL), dried over magnesium sulphate and concentrated under reduced pressure. The resulting brown oil was purified by flash column chromatography (hexane) and the remaining bromoform was evaporated under high vacuum (10 h,  $30\text{ }^\circ\text{C}$ ) to yield ((2,2-dibromo-1-methylcyclopropyl)methyl)benzene **S-3** (20.7 g, 68.1 mmol, 90%) as a yellow oil.

$\nu_{\text{max}}/\text{cm}^{-1}$  1602 w, 1582 w, 1493 m, (Ar C=C), 710 s (Br-C);  $\delta_{\text{H}}$  (200 MHz,  $\text{CDCl}_3$ ) 7.38-7.25 (5H, m, Ar-H), 3.09 (1H, d,  $J = 14.8$ , CHHPh), 3.01 (1H, d,  $J = 14.8$ , CHHPh), 1.73 (1H, d,  $J = 7.4$ , CHHCBr<sub>2</sub>), 1.54 (1H, d,  $J = 7.4$ , CHHCBr<sub>2</sub>), 1.31 (3H, s, CH<sub>3</sub>);  $\delta_{\text{C}}$  (50 MHz,  $\text{CDCl}_3$ ) 138.6 (C), 129.2 (CH), 128.5 (CH), 126.5 (CH), 43.9 (CH<sub>2</sub>), 39.2 (C), 34.3 (CH<sub>2</sub>), 30.5 (C), 22.9 (CH<sub>3</sub>);  $M^+(\text{EI}) = 301.9297$  required  $M = 301.9300$

### ((2-Bromo-1-methylcyclopropyl)methyl)benzene **S-4**

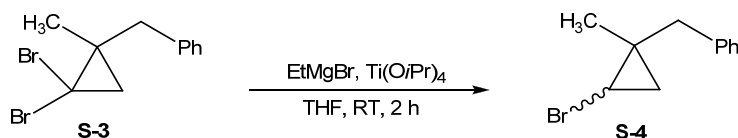

A solution of ethylmagnesium bromide (3 M in Et<sub>2</sub>O, 17.0 mL, 51.0 mmol) was added over 1 hour to a stirring solution of ((2,2-dibromo-1-methylcyclopropyl)methyl)benzene **S-3** (11.9 g, 39.2 mmol), Ti(OiPr)<sub>4</sub> (0.223 g, 0.785 mmol) and tetrahydrofuran (80 mL). The solution was allowed to stir for an additional hour at 20 °C. The reaction was quenched by slow addition of water (20 mL), then 20% aqueous sulphuric acid (50 mL) was added and the mixture stirred for 30 minutes. Diethyl ether (50 mL) was added and the layers were partitioned. The aqueous layer was washed further three times with diethyl ether (50 mL). The combined organic layers were washed twice with saturated sodium bicarbonate (50 mL), washed with brine (50 mL), dried over magnesium sulphate and concentrated under reduced pressure. The crude material was purified by flash column chromatography (eluent: petrol ether) to yield a mixture of the two diastereomers of ((2-bromo-1-methylcyclopropyl)methyl)benzene **S-4** (7.96 g, 35.4 mmol, 90%) as a colourless oil.

$\nu_{\text{max}}/\text{cm}^{-1}$  1603 w, 1496 m, 1453 m, (Ar C=C), 704 s (Br-C);  $\delta_{\text{H}}$  (200 MHz, CDCl<sub>3</sub>) 7.28-7.09 (5H, m, ArH), 2.99-2.61 (3H, m, CHBr and CH<sub>2</sub>Ph), 1.18-0.63 (5H, m, CH<sub>2</sub>CHBr and CH<sub>3</sub>);  $\delta_{\text{C}}$  (50 MHz, CDCl<sub>3</sub>) 139.6 (C), 138.6 (C), 129.3 (CH), 129.2 (CH), 128.3 (CH), 128.2 (CH), 126.3 (CH), 126.1 (CH), 44.0 (CH<sub>2</sub>), 41.9 (CH<sub>2</sub>), 29.9 (CH), 29.3 (CH), 22.6 (CH<sub>3</sub>), 22.3 (CH<sub>2</sub>), 22.0 (C), 21.8 (C), 21.5 (CH<sub>2</sub>), 20.8 (CH<sub>3</sub>).



### ((1-Methylcycloallyl)methyl)benzene **6**

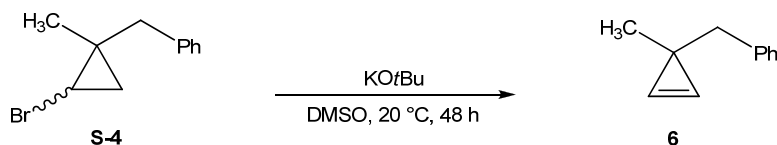

Potassium *tert*-butoxide (5.40 g, 48.0 mmol) and dimethyl sulfoxide (35 mL) were heated to 60 °C and allowed to stir for 30 minutes at this temperature until the solution became homogenous. The solution was cooled to room temperature and ((2-bromo-1-methylcyclopropyl)methyl)benzene **S-4** (7.78 g, 34.6 mmol) was added dropwise over a period of 1 hour. The reaction mixture was allowed to stir for 48 h at 20 °C, then quenched by addition of ice cold water (100 mL). Pentane (500 mL) was added and the layers partitioned. The aqueous layer was washed three times with pentane (50 mL). The combined organic layers were washed with water (50 mL x 3), brine (100 mL), dried over magnesium sulphate and concentrated under reduced pressure. The resulting yellow-orange oil was purified by flash column chromatography (pentane) to yield ((1-methylcycloallyl)methyl)benzene **6** (2.98 g, 20.7 mmol, 60%) as a colourless oil.

$\nu_{\max}/\text{cm}^{-1}$  1629 w (C=C), 1604 w, 1495 m, 1452 m, (Ar C=C);  $\delta_{\text{H}}$  (200 MHz, CDCl<sub>3</sub>) 7.28 (2H, s, C=CH), 7.25-7.00 (5H, m, ArH), 2.70 (2H, s, CH<sub>2</sub>Ph), 1.12 (3H, s, CH<sub>3</sub>);  $\delta_{\text{C}}$  (50 MHz, CDCl<sub>3</sub>) 141.1 (C), 129.2 (CH), 128.0 (CH), 125.5 (CH), 122.0 (CH), 47.7 (CH<sub>2</sub>), 26.8 (CH<sub>3</sub>), 21.6 (C);  $M^+$ (EI) = 143.0853 required  $M = 143.0855$ .

### General Procedure: Gold(I) catalysed addition of alcohols to cyclopropene 1

**Method A:** Ph<sub>3</sub>PAuCl (5 mol%) and AgOTf (5 mol%) were added to a solution of 3-methyl-3-nonylcycloprop-1-ene **1** (1 eq.) and ROH (6 eq.) in dichloromethane (0.55 M). The reaction mixture was allowed to stir for 1-2 h at 20 °C. The solvent was evaporated and the residue was purified by flash column chromatography to yield the corresponding *tert*-allylic ether product.

**Method B:** Ph<sub>3</sub>PAuNTf<sub>2</sub> (as the 2:1 toluene adduct) (5 mol%) was added to a solution of 3-methyl-3-nonylcycloprop-1-ene **1** (1 eq.) and ROH (6 eq.) in dichloromethane (0.55 M). The reaction mixture was allowed to stir for 1-2 h at 20 °C. The solvent was evaporated and the residue was purified by flash column chromatography to yield the corresponding *tert*-allylic ether product.

### 3-Methoxy-3-methyldodec-1-ene 2a

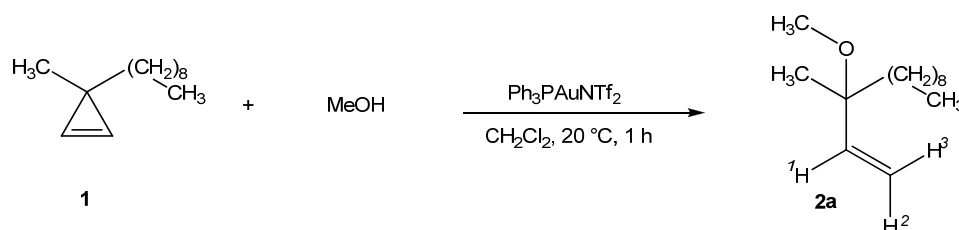

Ph<sub>3</sub>PAuNTf<sub>2</sub> (as the 2:1 toluene adduct) (9.1 mg, 1.15 x 10<sup>-5</sup> mol) was added to a solution of 3-methyl-3-nonylcycloprop-1-ene **1** (48.2 mg, 0.267 mmol) and methanol (48.5 mg, 1.51 mmol) in dichloromethane (0.5 mL). The reaction mixture was allowed to stir for 1 h at 20 °C. The solvent was evaporated and the residue was purified by flash column chromatography (95% petrol ether, 5% diethyl ether) to yield 3-methoxy-3-methyldodec-1-ene **2a** (49.0 mg, 0.231 mmol, 86%) as a colourless oil.

$\nu_{\max}/\text{cm}^{-1}$  1639 vw (C=C), 1079 s (C-O);  $\delta_{\text{H}}$  (200 MHz, CDCl<sub>3</sub>) 5.74 (1H, dd,  $J$  = 17.4, 10.8, H-1), 5.15 (1H, dd,  $J$  = 10.8, 1.7, H-2), 5.10 (1H, dd,  $J$  = 17.4, 1.7, H-3), 3.14 (3H, s, OCH<sub>3</sub>), 1.33 - 0.81 (22H, m, alkyl-H);  $\delta_{\text{C}}$  (50 MHz, CDCl<sub>3</sub>) 143.0 (CH), 114.5 (CH<sub>2</sub>), 77.4 (C), 50.0 (CH<sub>3</sub>), 39.7 (CH<sub>2</sub>), 31.9 (CH<sub>2</sub>), 30.2 (CH<sub>2</sub>), 29.6 (CH<sub>2</sub>), 29.3 (CH<sub>2</sub>), 23.6 (CH<sub>2</sub>), 22.7 (CH<sub>2</sub>), 21.2 (CH<sub>3</sub>), 14.1 (CH<sub>3</sub>);  $M^+$ (EI) = 212.2153 required  $M$  = 212.2140.

### 3-Ethoxy-3-methyldodec-1-ene **2b**

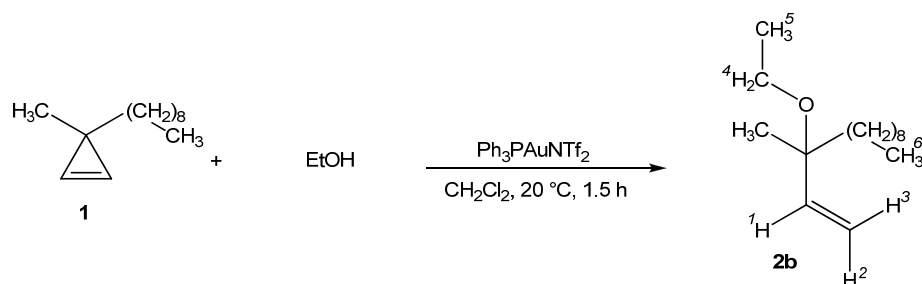

Ph<sub>3</sub>PAuNTf<sub>2</sub> (as the 2:1 toluene adduct) (11.7 mg, 1.49 × 10<sup>-5</sup> mol) was added to a solution of 3-methyl-3-nonylcycloprop-1-ene **1** (53.6 mg, 0.297 mmol) and ethanol (85.9 mg, 1.86 mmol) in dichloromethane (0.5 mL). The reaction mixture was allowed to stir for 1.5 h at 20 °C. The solvent was evaporated and the residue was purified by flash column chromatography (90% petrol ether, 10% diethyl ether) to yield 3-ethoxy-3-methyldodec-1-ene **2b** (55.7 mg, 0.246 mmol, 83%) as a colourless oil.

$\nu_{\max}/\text{cm}^{-1}$  1660 vw (C=C), 1070 s (C-O);  $\delta_{\text{H}}$  (200 MHz, CDCl<sub>3</sub>) 5.76 (1H, dd,  $J$  = 17.0, 11.2, H-1), 5.12 (1H, dd,  $J$  = 11.2, 1.2, H-2), 5.08 (1H, dd,  $J$  = 17.0, 1.2, H-3), 3.32 (2H, q,  $J$  = 7.1, H-4), 1.62 – 1.19 (19H, m, alkyl-H), 1.14 (3H, t,  $J$  = 7.1, H-5), 0.87 (3H, t,  $J$  = 6.4, H-6);  $\delta_{\text{C}}$  (50 MHz, CDCl<sub>3</sub>) 143.7 (CH), 113.9 (CH<sub>2</sub>), 77.2 (C), 57.3 (CH<sub>2</sub>), 39.9 (CH<sub>2</sub>), 31.9 (CH<sub>2</sub>), 29.6 (CH<sub>2</sub>), 29.3 (CH<sub>2</sub>), 27.6 (CH<sub>2</sub>), 23.6 (CH<sub>2</sub>), 22.6 (CH<sub>2</sub>), 22.1 (CH<sub>3</sub>), 16.0 (CH<sub>3</sub>), 14.1 (CH<sub>3</sub>);  $M^+$ (EI) = 226.2291 required  $M$  = 226.2292.

### 3-(Allyloxy)-3-methyldodec-1-ene **2c**

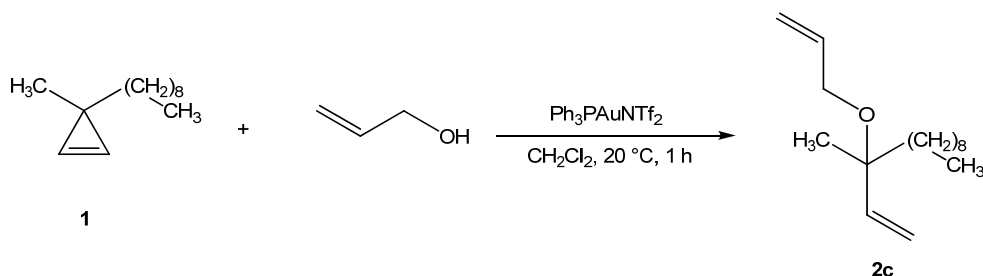

Ph<sub>3</sub>PAuNTf<sub>2</sub> (as the 2:1 toluene adduct) (11.0 mg, 1.40 x 10<sup>-5</sup> mol) was added to a solution of 3-methyl-3-nonylcycloprop-1-ene **1** (50.0 mg, 0.277 mmol) and 2-propen-1-ol (97 mg, 1.66 mmol) in dichloromethane (0.5 mL). The reaction mixture was allowed to stir for 1 h at 20 °C. The solvent was evaporated and the residue was purified by flash column chromatography (90% petrol ether, 10% diethyl ether) to yield 3-(allyloxy)-3-methyldodec-1-ene **2c** (58.1 mg, 0.244 mmol, 88%) as a colourless oil.

$\nu_{\max}/\text{cm}^{-1}$  1712 vw (C=C), 1646 w (C=C), 1060 s (C-O);  $\delta_{\text{H}}$  (200 MHz, CDCl<sub>3</sub>) 6.00 - 5.70 (2H, m, CH=CH<sub>2</sub> x 2), 5.32 - 5.07 (4H, m, CH=CH<sub>2</sub> x 2), 3.82 (2H, dt,  $J = 5.4, 1.7$ , OCH<sub>2</sub>), 1.50 - 1.16 (19H, m, alkyl-H), 0.87 (3H, t,  $J = 6.2$ , CH<sub>2</sub>CH<sub>3</sub>);  $\delta_{\text{C}}$  (50 MHz, CDCl<sub>3</sub>) 143.2 (CH), 136.0 (CH), 115.5 (CH<sub>2</sub>), 114.4 (CH<sub>2</sub>), 77.6 (C), 63.5 (CH<sub>2</sub>), 40.1 (CH<sub>2</sub>), 31.8 (CH<sub>2</sub>), 30.1 (CH<sub>2</sub>), 29.6 (CH<sub>2</sub>), 29.3 (CH<sub>2</sub>), 23.6 (CH<sub>2</sub>), 22.7 (CH<sub>2</sub>), 21.9 (CH<sub>3</sub>), 14.1 (CH<sub>3</sub>); [M+NH<sub>4</sub>]<sup>+</sup>(ESI) = 256.2636 required  $M = 256.2635$ .

**1-((3-Methyldodec-1-en-3-yloxy)methyl)benzene 2d**

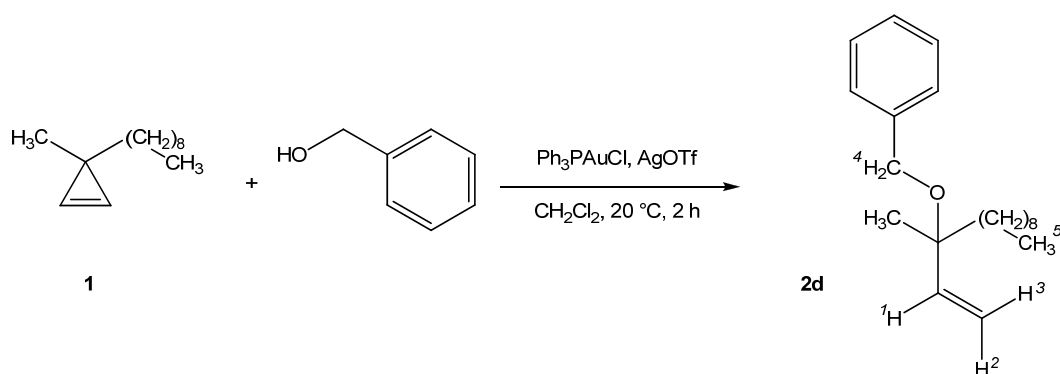

$\text{Ph}_3\text{PAuCl}$  (7.2 mg, 14.6  $\mu\text{mol}$ ) and  $\text{AgOTf}$  (3.5 mg, 13.6  $\mu\text{mol}$ ) were added to a solution of 3-methyl-3-nonylcycloprop-1-ene **1** (50.9 mg, 0.282 mmol) and phenylmethanol (180 mg, 1.66 mmol) in dichloromethane (0.5 mL). The reaction mixture was allowed to stir for 2 h at 20 °C. The solvent was evaporated and the residue was purified by flash column chromatography (90% petrol ether, 10% diethyl ether) to yield 1-((3-methyldodec-1-en-3-yloxy)methyl)benzene **2d** (63.5 mg, 0.220 mmol, 78%) as a colourless oil.

$\nu_{\text{max}}/\text{cm}^{-1}$  1639 vw (C=C), 1607 vw, 1497 w, 1454 m, (Ar C=C), 1060 s (C-O);  $\delta_{\text{H}}$  (400 MHz,  $\text{CDCl}_3$ ) 7.38 – 7.24 (5H, m, aryl-H), 5.89 (1H, dd,  $J = 18.2, 10.3$ , H-1), 5.22 (1H, dd,  $J = 10.3, 1.2$ , H-2), 5.21 (1H, dd,  $J = 18.2, 1.2$ , H-3), 4.40 (2H, s, H-4), 1.67 – 1.25 (19H, m, alkyl-H), 0.91 (3H, t,  $J = 6.9$ , H-5);  $\delta_{\text{C}}$  (100 MHz,  $\text{CDCl}_3$ ) 143.4 (CH), 139.9 (C), 128.2 (CH), 127.2 (CH), 127.0 (CH), 114.6 ( $\text{CH}_2$ ), 77.9 (C), 64.4 ( $\text{CH}_2$ ), 40.2 ( $\text{CH}_2$ ), 31.9 ( $\text{CH}_2$ ), 30.2 ( $\text{CH}_2$ ), 29.6 ( $\text{CH}_2$ ), 29.3 ( $\text{CH}_2$ ), 23.7 ( $\text{CH}_2$ ), 22.7 ( $\text{CH}_2$ ), 22.1 ( $\text{CH}_3$ ), 14.1 ( $\text{CH}_3$ );  $M^+$ (EI) = 288.2449 required  $M = 288.2453$ .

### 3-(But-3-enyloxy)-3-methyldodec-1-ene **2e**

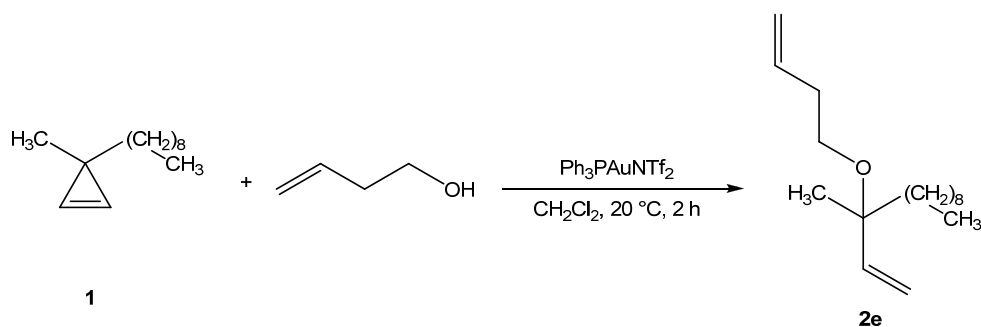

Ph<sub>3</sub>PAuNTf<sub>2</sub> (as the 2:1 toluene adduct) (11.2 mg, 1.42 x 10<sup>-5</sup> mol) was added to a solution of 3-methyl-3-nonylcycloprop-1-ene **1** (58.4 mg, 0.268 mmol) and 3-buten-1-ol (119 mg, 1.65 mmol) in dichloromethane (0.5 mL). The reaction mixture was allowed to stir for 1.5 h at 20 °C. The solvent was evaporated and the residue was purified by flash column chromatography (90% petrol ether, 10% diethyl ether) to yield 3-(but-3-enyloxy)-3-methyldodec-1-ene **2e** (59.6 mg, 0.236 mmol, 88%) as a colourless oil.

$\nu_{\max}/\text{cm}^{-1}$  1722 vw (C=C), 1641 w (C=C), 1083 s (C-O);  $\delta_{\text{H}}$  (200 MHz, CDCl<sub>3</sub>) 5.92 - 5.69 (2H, m, CH=CH<sub>2</sub> x), 5.15 - 4.96 (4H, m, CH=CH<sub>2</sub> x 2), 3.03 (2H, dt,  $J$  = 1.2, 7.1, OCH<sub>2</sub>), 2.27 (2H, m, CH<sub>2</sub>CH=CH<sub>2</sub>), 1.50 - 1.18 (19H, m, alkyl-H), 0.87 (3H, t,  $J$  = 5.8, CH<sub>2</sub>CH<sub>3</sub>);  $\delta_{\text{C}}$  (50 MHz, CDCl<sub>3</sub>) 143.5 (CH), 135.7 (CH), 115.9 (CH<sub>2</sub>), 114.1 (CH<sub>2</sub>), 77.2 (C), 61.5 (CH<sub>2</sub>), 39.9 (CH<sub>2</sub>), 35.0 (CH<sub>2</sub>), 31.8 (CH<sub>2</sub>), 30.1 (CH<sub>2</sub>), 29.6 (CH<sub>2</sub>), 29.3 (CH<sub>2</sub>), 23.6 (CH<sub>2</sub>), 22.7 (CH<sub>2</sub>), 21.9 (CH<sub>3</sub>), 14.1 (CH<sub>3</sub>); [M+NH<sub>4</sub>]<sup>+</sup>(ESI) = 270.2793 required  $M$  = 270.2791.

### 1-(2-(3-Methyldodec-1-en-3-yloxy)ethyl)benzene **2f**

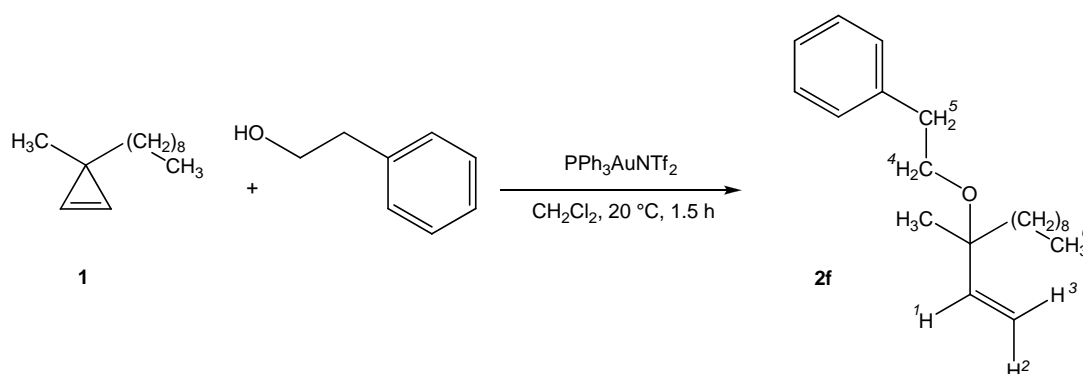

Ph<sub>3</sub>PAuNTf<sub>2</sub> (as the 2:1 toluene adduct) (11.4 mg, 1.45 x 10<sup>-5</sup> mol) was added to a solution of 3-methyl-3-nonylcycloprop-1-ene **1** (50.0 mg, 0.277 mmol) and 2-phenylethanol (203 mg, 1.66 mmol) in dichloromethane (0.5 mL). The reaction mixture was allowed to stir for 1.5 h at 20 °C. The solvent was evaporated and the residue was purified by flash column chromatography (90% petrol ether, 10% diethyl ether) to yield 1-(2-(3-methyldodec-1-en-3-yloxy)ethyl)benzene **2f** (64.5 mg, 0.213 mmol, 77%) as a colourless oil.

$\nu_{\max}/\text{cm}^{-1}$  1642 vw (C=C), 1605 vw, 1496 w, 1456 m, (Ar C=C), 1077 s (C-O);  $\delta_{\text{H}}$  (200 MHz, CDCl<sub>3</sub>) 7.25 – 7.07 (5H, m, aryl-H), 5.63 (1H, dd,  $J = 17.4, 10.8$ , H-1), 5.02 (1H, dd,  $J = 10.8, 1.2$ , H-2), 4.98 (1H, dd,  $J = 17.4, 1.2$ , H-3), 3.35 (2H, t,  $J = 7.5$ , H-4), 2.75 (2H, t,  $J = 7.5$ , H-5), 1.51 – 1.08 (19H, m, alkyl-H), 0.81 (3H, t,  $J = 6.5$ , H6) ;  $\delta_{\text{C}}$  (50 MHz, CDCl<sub>3</sub>) 143.4 (CH), 139.4 (C), 129.0 (CH), 128.1 (CH), 126.0 (CH), 114.2 (CH<sub>2</sub>), 77.4 (C), 63.4 (CH<sub>2</sub>), 40.0 (CH<sub>2</sub>), 37.2 (CH<sub>2</sub>), 31.9 (CH<sub>2</sub>), 30.1 (CH<sub>2</sub>), 29.6 (CH<sub>2</sub>), 29.3 (CH<sub>2</sub>), 23.6 (CH<sub>2</sub>), 22.7 (CH<sub>2</sub>), 21.9 (CH<sub>3</sub>), 14.1 (CH<sub>3</sub>);  $M^+(\text{EI}) = 302.2604$  required  $M = 302.2603$ .

### 3-Isopropoxy-3-methyldec-1-ene **2g**

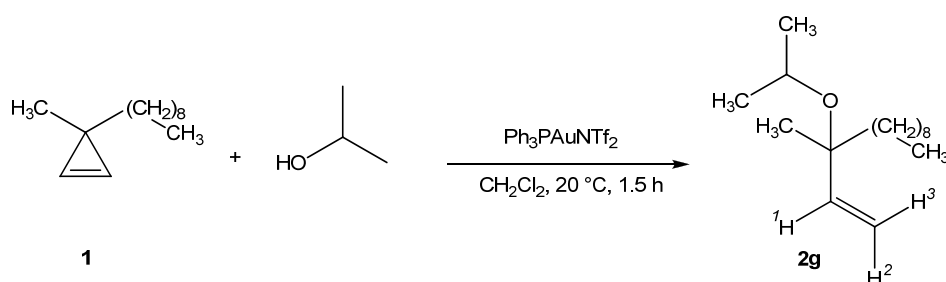

$\text{Ph}_3\text{PAuNTf}_2$  (as the 2:1 toluene adduct) ( $11.4\text{ mg}$ ,  $1.45 \times 10^{-5}\text{ mol}$ ) was added to a solution of 3-methyl-3-nonylcycloprop-1-ene **1** ( $51.0\text{ mg}$ ,  $0.283\text{ mmol}$ ) and propan-2-ol ( $107\text{ mg}$ ,  $1.78\text{ mmol}$ ) in dichloromethane ( $0.5\text{ mL}$ ). The reaction mixture was allowed to stir for 1.5 h at  $20\text{ }^\circ\text{C}$ .  $^1\text{H-NMR}$  analysis of the crude product showed 97:3 ratio of **2g** and **3g**. The solvent was evaporated and the residue was purified by flash column chromatography (90% petrol ether, 10% diethyl ether) to yield 3-isopropoxy-3-methyldec-1-ene **2g** ( $47.7\text{ mg}$ ,  $0.198\text{ mmol}$ , 70%) as a colourless oil.

$\nu_{\text{max}}/\text{cm}^{-1}$  1639 vw (C=C), 1102 s (C-O);  $\delta_{\text{H}}$  (200 MHz,  $\text{CDCl}_3$ ) 5.82 (1H, dd,  $J = 17.4, 11.2$ , H-1), 5.12 (1H, dd,  $J = 11.2, 1.2$ , H-2), 5.07 (1H, dd,  $J = 17.4, 1.2$ , H-3), 3.66 (1H, septet,  $J = 6.2$ ,  $\text{CHMe}_2$ ), 1.62 – 1.19 (19H, m, alkyl-H), 1.09 (3H, d,  $J = 6.2$ ,  $\text{CH}_3$ ), 1.07 (3H, d,  $J = 6.2$ ,  $\text{CH}_3$ ), 0.87 (3H, t,  $J = 6.0$ ,  $\text{CH}_2\text{CH}_3$ );  $\delta_{\text{C}}$  (50 MHz,  $\text{CDCl}_3$ ) 144.2 (CH), 114.0 ( $\text{CH}_2$ ), 77.9 (C), 64.2 (CH), 41.2 ( $\text{CH}_2$ ), 31.9 ( $\text{CH}_2$ ), 30.2 ( $\text{CH}_2$ ), 29.6 ( $\text{CH}_2$ ), 29.3 ( $\text{CH}_2$ ), 25.0 ( $\text{CH}_3$ ), 24.9 ( $\text{CH}_3$ ), 23.9 ( $\text{CH}_2$ ), 22.7 ( $\text{CH}_2$ ), 22.0 ( $\text{CH}_3$ ), 14.1 ( $\text{CH}_3$ );  $M^+(\text{EI}) = 240.2448$  required  $M = 240.2447$ .



### 3-Methyl-dodec-1-en-3-ol **2i**

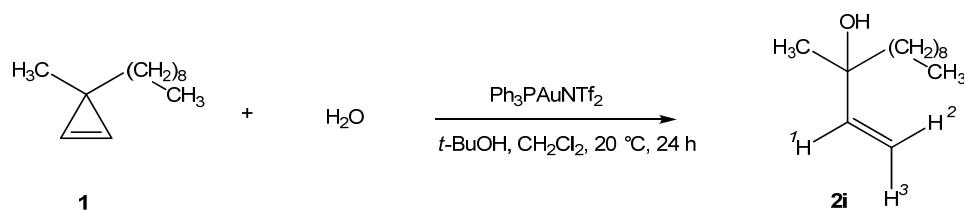

Ph<sub>3</sub>PAuNTf<sub>2</sub> (as the 2:1 toluene adduct) (5.8 mg, 7.37 x 10<sup>-6</sup> mol) was added to a solution of 3-methyl-3-nonylcycloprop-1-ene **1** (25.2 mg, 0.140 mmol), water (16.1 mg, 0.893 mmol), *tert*-butanol<sup>§</sup> (154 mg, 2.07 mmol) and dichloromethane (0.2 mL). The reaction mixture was allowed to stir for 24 h at 20 °C. Then, the solvent was evaporated and the residue was purified by flash column chromatography (50% petrol ether, 50% diethyl ether) to yield 3-methyl-dodec-1-en-3-ol **2i** (9.4 mg, 0.0474 mmol, 34%) as a colourless oil.

$\nu_{\max}/\text{cm}^{-1}$  3391 br (OH), 1641 vw (C=C);  $\delta_{\text{H}}$  (200 MHz, CDCl<sub>3</sub>) 5.91 (1H, dd,  $J = 17.4, 10.8$ , H-1), 5.19 (1H, dd,  $J = 17.4, 1.2$ , H-2), 5.04 (1H, dd,  $J = 10.8, 1.2$ , H-3), 1.59 – 1.16 (19H, m, alkyl-H), 0.87 (3H, t,  $J = 6.2$ , CH<sub>2</sub>CH<sub>3</sub>);  $\delta_{\text{C}}$  (50 MHz, CDCl<sub>3</sub>) 145.2 (CH), 111.4 (CH<sub>2</sub>), 73.3 (C), 42.3 (CH<sub>2</sub>), 31.8 (CH<sub>2</sub>), 30.0 (CH<sub>2</sub>), 29.6 (CH<sub>2</sub>), 29.3 (CH<sub>2</sub>), 27.6 (CH<sub>3</sub>), 23.9 (CH<sub>2</sub>), 22.6 (CH<sub>2</sub>), 14.1 (CH<sub>3</sub>);  $M^+$ (EI) = 198.1970 required  $M = 198.1984$ .

<sup>§</sup> *t*-BuOH was added as a co-solvent to homogenize the layers. In the absence of *t*-BuOH co-solvent, a lower yield of 17% was observed. This lower yield is probably due to the biphasic nature (H<sub>2</sub>O/CH<sub>2</sub>Cl<sub>2</sub>) of the resulting reaction mixture.

### (4-(1-Vinylcyclohexyloxy)butyl)benzene **5**

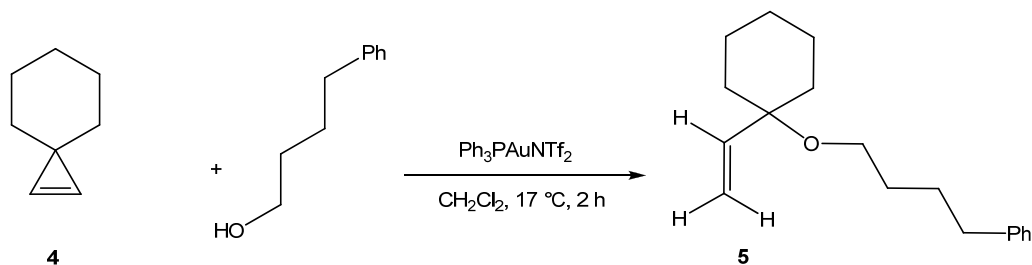

$\text{Ph}_3\text{PAuNTf}_2$  (as the 2:1 toluene adduct) (7.7 mg,  $9.74 \times 10^{-6}$  mol) was added to a solution of spiro[2.5]oct-1-ene **4**<sup>5</sup> (20.0 mg, 0.185 mmol), 4-phenylbutan-1-ol (0.17 mL, 1.11 mmol) and dichloromethane (0.4 mL). The reaction mixture was allowed to stir for 2 h at ambient temperature ( $17\text{ }^\circ\text{C}$ ). Then, the solvent was evaporated and the residue was purified by flash column chromatography (98% n-pentane, 2% diethyl ether) to yield (4-(1-vinylcyclohexyloxy)butyl)benzene **5** (41.5 mg, 0.161 mmol, 87%) as a colourless oil.

$\nu_{\text{max}}/\text{cm}^{-1}$  1638 vw (C=C), 1604 vw, 1495 w, 1451 m, (Ar C=C), 1073 s (C-O);  $\delta_{\text{H}}$  (400 MHz,  $\text{CDCl}_3$ ) 7.21-7.07 (5H, m, ArH), 5.64 (1H, dd,  $J = 17.7, 11.0$ ,  $\text{CH}=\text{CH}_2$ ), 5.04 (2H, m,  $\text{CH}=\text{CH}_2$ ), 3.16 (2H, t,  $J = 6.5$ ,  $\text{OCH}_2$ ), 2.56 (2H, t,  $J = 7.6$ ,  $\text{PhCH}_2$ ), 1.69 – 1.11 (14H, m,  $\text{CH}_2$ );  $\delta_{\text{C}}$  (100 MHz,  $\text{CDCl}_3$ ) 143.8 (CH), 142.7 (C), 128.4 (CH), 128.2 (CH), 125.6 (CH), 114.2 ( $\text{CH}_2$ ), 75.2 (C), 61.0 ( $\text{CH}_2$ ), 35.9 ( $\text{CH}_2$ ), 34.3 ( $\text{CH}_2$ ), 30.1 ( $\text{CH}_2$ ), 28.3 ( $\text{CH}_2$ ), 25.8 ( $\text{CH}_2$ ), 21.9 ( $\text{CH}_2$ );  $[\text{M} + \text{NH}_4]^+$  (ESI) = 276.2326 required  $[\text{M} + \text{NH}_4]^+ = 276.2322$ .

### 2-Ethoxy-2-methylbut-3-enyl)benzene **7**

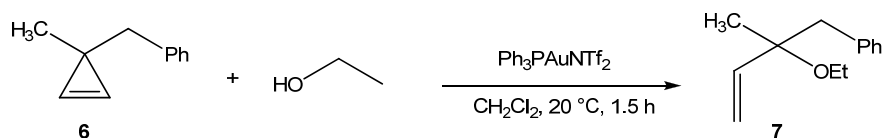

$\text{Ph}_3\text{PAuNTf}_2$  (as the 2:1 toluene adduct) (11.0 mg,  $1.4 \times 10^{-5}$  mol) was added to a solution of ((1-methylcycloallyl)methyl)benzene **6** (39.0 mg, 0.270 mmol) and ethanol (77 mg, 1.66 mmol) in dichloromethane (0.5 mL). The reaction mixture was allowed to stir for 1.5 h at  $20^\circ\text{C}$ . The crude product was filtered through a plug of silica (eluent: diethyl ether) and a crude  $^1\text{H-NMR}$  spectra was obtained. The solvent was evaporated and the residue was purified by flash column chromatography (98% pentane, 2% diethyl ether) to yield 2-ethoxy-2-methylbut-3-enyl)benzene **7** (40.9 mg, 0.215 mmol, 80%) as a colourless oil.

$\nu_{\text{max}}/\text{cm}^{-1}$  1646 vw (C=C), 1602 vw, 1495 w, 1454 w, (Ar C=C), 1063 s (C-O);  $\delta_{\text{H}}$  (200 MHz,  $\text{CDCl}_3$ ) 7.22-7.02 (5H, m, ArH), 5.71 (1H, dd,  $J = 17.4, 10.8$ ,  $\text{CH}=\text{CH}_2$ ), 5.07 (1H, dd,  $J = 10.8, 1.2$ ,  $\text{CH}=\text{CHH}_{\text{cis}}$ ), 4.96 (1H, dd,  $J = 17.4, 1.2$ ,  $\text{CH}=\text{CHH}_{\text{trans}}$ ), 3.31 (2H, q,  $J = 6.6$ ,  $\text{OCH}_2$ ), 2.80 (1H, d,  $J = 13.3$ ,  $\text{CHHPh}$ ), 2.71 (1H, d,  $J = 13.3$ ,  $\text{CHHPh}$ ), 1.11 (3H, s,  $\text{CH}_3$ ), 1.10 (3H, t,  $J = 6.6$ ,  $\text{OCH}_2\text{CH}_3$ );  $\delta_{\text{C}}$  (50 MHz,  $\text{CDCl}_3$ ) 142.9 (CH), 137.6 (C), 130.8 (CH), 127.6 (CH), 126.0 (CH), 114.7 ( $\text{CH}_2$ ), 57.6 ( $\text{CH}_2$ ), 47.2 ( $\text{CH}_2$ ), 21.1 ( $\text{CH}_3$ ), 15.9 ( $\text{CH}_3$ ).  $[\text{M-H}]^+ = 189.1274$  required  $[\text{M-H}]^+ = 189.1274$ .

**(4-(2-Methyl-1-phenylbut-3-en-2-yloxy)butyl)benzene 8**

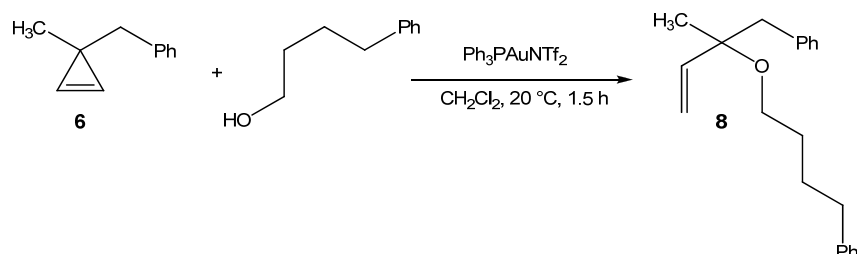

$\text{Ph}_3\text{PAuNTf}_2$  (as the 2:1 toluene adduct) (13.4 mg,  $1.7 \times 10^{-5}$  mol) was added to a solution of ((1-methylcycloallyl)methyl)benzene **6** (46.8 mg, 0.325 mmol) and 4-phenyl-1-butanol (0.3 mL, 1.95 mmol) in dichloromethane (0.7 mL). The reaction mixture was allowed to stir for 1.5 h at  $20\text{ }^\circ\text{C}$ . The crude product was filtered through a plug of silica (eluent: diethyl ether) and a crude  $^1\text{H-NMR}$  spectra was obtained. The solvent was evaporated and the residue was purified by flash column chromatography (98% pentane, 2% diethyl ether) to yield (4-(2-methyl-1-phenylbut-3-en-2-yloxy)butyl)benzene **8** (82.4 mg, 0.284 mmol, 86%) as a colourless oil.

$\nu_{\text{max}}/\text{cm}^{-1}$  1630 vw (C=C), 1603 w, 1495 m, 1453 m, (Ar C=C), 1077 s (C-O);  $\delta_{\text{H}}$  ( $\text{CDCl}_3$ , 200 MHz)  $\delta$  7.34 - 7.14 (10H, m, Ar-H), 5.78 (1H, dd,  $J = 17.6, 10.9$ ,  $\text{HC}=\text{CH}_2$ ), 5.15 (1H, dd,  $J = 10.9, 1.3$ ,  $\text{HC}=\text{CH}_2$ ), 5.05 (1H, dd,  $J = 17.6, 1.3$ ,  $\text{HC}=\text{CH}_2$ ), 3.34 (2H, t,  $J = 6.3$ , O- $\text{CH}_2$ ), 2.82 (2H, dd,  $J = 15.5, 2.2$  Ar- $\text{CH}_2$ -C), 2.63 (2H, t,  $J = 7.2$ , Ar- $\text{CH}_2$ - $\text{CH}_2$ ), 1.64 (4H, m,  $\text{CH}_2$ ), 1.19, (3H, s,  $\text{CH}_3$ );  $\delta_{\text{C}}$  ( $\text{CDCl}_3$ , 50 MHz)  $\delta$  143.2 (CH), 142.9 (C), 137.9 (C), 131.1 (CH), 128.6 (CH), 128.4 (CH), 127.8 (CH), 126.3 (CH), 125.8 (CH), 115.0 ( $\text{CH}_2$ ), 77.6 (C), 62.2 ( $\text{CH}_2$ ), 47.8 ( $\text{CH}_2$ ), 36.0 ( $\text{CH}_2$ ), 30.3 ( $\text{CH}_2$ ), 28.4 ( $\text{CH}_2$ ), 21.1 ( $\text{CH}_3$ );  $[\text{M} + \text{NH}_4]^+ = 312.2326$  required  $[\text{M} + \text{NH}_4]^+ = 312.2322$ .

**(4-(3-Benzyl-4-methylpent-1-en-3-yloxy)butyl)benzene 10**

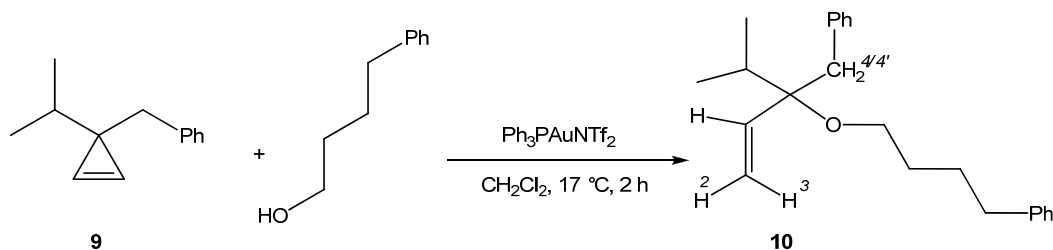

$\text{Ph}_3\text{PAuNTf}_2$  (as the 2:1 toluene adduct) (7.2 mg,  $9.16 \times 10^{-6}$  mol) was added to a solution of ((1-isopropylcycloallyl)methyl)benzene **9** (30.0 mg, 0.174 mmol), 4-phenylbutan-1-ol (0.16 mL, 1.02 mmol) and dichloromethane (0.5 mL). The reaction mixture was allowed to stir for 2 h at  $17\text{ }^\circ\text{C}$ . Then, the solvent was evaporated and the residue was purified by flash column chromatography (99% n-pentane, 1% diethyl ether) to yield (4-(3-benzyl-4-methylpent-1-en-3-yloxy)butyl)benzene **10** (40.8 mg, 0.127 mmol, 73%) as a colourless oil.

$\nu_{\text{max}}/\text{cm}^{-1}$  1639 vw (C=C), 1603 w, 1496 m, 1453 m, (Ar C=C), 1080 s (C-O);  $\delta_{\text{H}}$  (200 MHz,  $\text{CDCl}_3$ ) 7.36-7.11 (10H, m, Ar-H), 5.77 (1H, dd,  $J = 17.7, 11.3$ , HC=CH<sub>2</sub>), 5.27 (1H, dd,  $J = 11.3, 1.6$ , H-2), 5.13 (1H, dd,  $J = 17.7, 1.6$ , H-3), 3.42 (2H, m, O-CH<sub>2</sub>), 3.03 (1H, d,  $J = 14.8$ , H-4), 2.84 (1H, d,  $J = 14.8$ , H-4'), 2.63 (2H, t,  $J = 7.1$ , Ph-CH<sub>2</sub>), 1.95-1.50 (5H, m, 2xCH<sub>2</sub> + HC(CH<sub>3</sub>)<sub>2</sub>), 0.88 (3H, d,  $J = 6.8$ , HC-(CH<sub>3</sub>)<sub>2</sub>), 0.82 (3H, d,  $J = 6.8$ , HC-(CH<sub>3</sub>)<sub>2</sub>);  $\delta_{\text{C}}$  (100 MHz,  $\text{CDCl}_3$ ) 142.7 (C), 139.0 (CH), 137.9 (C), 130.5 (CH), 128.4 (CH), 128.2 (CH), 127.8 (CH), 125.9 (CH), 125.6 (CH), 116.5 (CH<sub>2</sub>), 81.8 (C), 61.4 (CH<sub>2</sub>), 36.6 (CH<sub>2</sub>), 35.8 (CH<sub>2</sub>), 32.7 (CH), 29.9 (CH<sub>2</sub>), 28.2 (CH<sub>2</sub>), 17.6 (CH<sub>3</sub>), 16.8 (CH<sub>3</sub>);  $[\text{M} + \text{NH}_4]^+$  (ESI) = 340.2639 required  $[\text{M} + \text{NH}_4]^+ = 340.2635$ .

**(4-(3,4,4-Trimethylpent-1-en-3-yloxy)butyl)benzene 12**

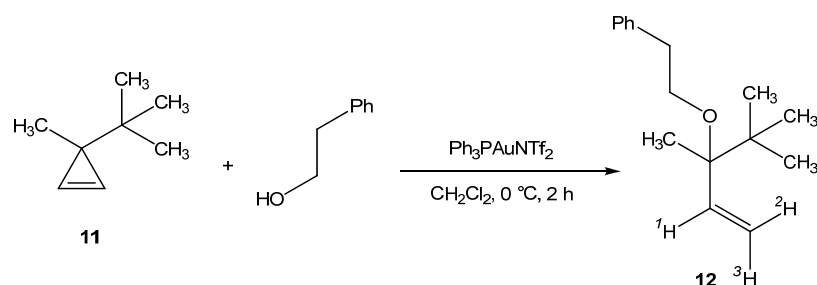

$\text{Ph}_3\text{PAuNTf}_2$  (as the 2:1 toluene adduct) (11.6 mg,  $1.47 \times 10^{-5}$  mol) was added to a solution of 3-tert-butyl-3-methylcycloprop-1-ene **11**<sup>4</sup> (30.8 mg, 0.280 mmol), phenethyl alcohol (0.20 mL, 1.680 mmol) and dichloromethane (0.5 mL). The reaction mixture was allowed to stir for 2 h at  $0\text{ }^\circ\text{C}$ . Then, the solvent was evaporated and the residue was purified by flash column chromatography (98% n-pentane, 2% diethyl ether) to yield (4-(3,4,4-trimethylpent-1-en-3-yloxy)butyl)benzene **12** (41.5 mg, 0.179 mmol, 64%) as a colourless oil.

$\nu_{\text{max}}/\text{cm}^{-1}$  1642 vw (C=C), 1605 vw, 1496 w, 1454 m (Ar C=C), 1064 s (C-O);  $\delta_{\text{H}}$  (200 MHz,  $\text{CDCl}_3$ ) 7.14-7.30 (5H, m, ArH), 5.72 (1H, dd,  $J = 17.7, 11.1$ , H-1), 5.14 (1H, dd,  $J = 17.7, 1.7$ , H-2), 4.95 (1H, dd,  $J = 11.1, 1.7$ , H-3), 3.44 (2H, m,  $\text{OCH}_2$ ), 2.79 (2H, t,  $J = 6.9$ ,  $\text{CH}_2\text{Ph}$ ), 1.13 (3H, s,  $\text{CH}_3$ ), 0.87 (9H, s,  $\text{C}(\text{CH}_3)_3$ );  $\delta_{\text{C}}$  (100 MHz,  $\text{CDCl}_3$ ) 141.4 (CH), 140.1 (C), 129.0 (CH), 128.0 (CH), 125.8 (CH), 115.7 ( $\text{CH}_2$ ), 81.2 (C), 63.4 ( $\text{CH}_2$ ), 37.8 (C), 37.3 ( $\text{CH}_2$ ), 25.5 ( $\text{CH}_3$ ), 15.8 ( $\text{CH}_3$ );  $[\text{M} + \text{NH}_4]^+$  (ESI) = 250.2165 required  $[\text{M} + \text{NH}_4]^+ = 250.2168$ .

### (2-Isopropoxy-2-isopropylbut-3-enyl)benzene **13**

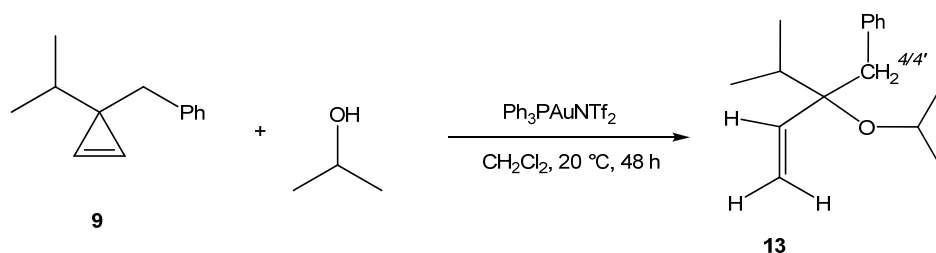

$\text{Ph}_3\text{PAuNTf}_2$  (as the 2:1 toluene adduct) (6.2 mg,  $7.93 \times 10^{-6}$  mol) was added to a solution of ((1-isopropylcycloallyl)methyl)benzene **9** (26 mg, 0.151 mmol), propan-2-ol (69  $\mu\text{L}$ , 0.906 mmol) and dichloromethane (0.3 mL). The reaction mixture was allowed to stir for 48 h at  $20\text{ }^\circ\text{C}$ . Then, the solvent was evaporated and the residue was purified twice by flash column chromatography (99% n-pentane, 1% diethyl ether) to yield (2-isopropoxy-2-isopropylbut-3-enyl)benzene **13a** (15.6 mg, 0.0672 mmol, 45%) as a pale green oil.

$\nu_{\text{max}}/\text{cm}^{-1}$  1637 vw (C=C), 1602 w, 1495 m, 1454 m, (Ar C=C), 1076 s (C-O);  $\delta_{\text{H}}$  (400 MHz,  $\text{CDCl}_3$ ) 7.47-7.11 (5H, m, Ar-H), 5.93 (1H, dd,  $J = 17.9, 11.4$ ,  $\underline{\text{H}}\text{C}=\text{CH}_2$ ), 5.35 (1H, dd,  $J = 11.4, 1.3$ ,  $\text{HC}=\underline{\text{C}}\text{H}\underline{\text{H}}$ ), 5.26 (1H, dd,  $J = 17.9, 1.3$ ,  $\text{HC}=\underline{\text{C}}\text{H}\underline{\text{H}}$ ), 3.93 (1H, septet,  $J = 6.2$ , O- $\underline{\text{C}}\text{H}(\text{CH}_3)_2$ ), 3.05 (1H, d,  $J = 14.9$ , H-4), 2.94 (1H, d,  $J = 14.9$ , H-4'), 1.89 (1H, septet,  $J = 6.8$ ,  $\underline{\text{C}}\text{H}(\text{CH}_3)_2$ ), 1.21 (3H, d,  $J = 6.2$ ,  $\text{CH}(\underline{\text{C}}\text{H}_3)_2$ ), 1.18 (3H, d,  $J = 6.2$ ,  $\text{CH}(\underline{\text{C}}\text{H}_3)_2$ ), 0.96 (3H, d,  $J = 6.8$ ,  $\text{CH}(\underline{\text{C}}\text{H}_3)_2$ ), 0.76 (3H, d,  $J = 6.8$ ,  $\text{CH}(\underline{\text{C}}\text{H}_3)_2$ );  $\delta_{\text{C}}$  (100 MHz,  $\text{CDCl}_3$ ) 139.5 (CH), 130.8 (C), 128.4 (CH), 127.7 (CH), 125.9 (CH), 116.3 (CH<sub>2</sub>), 82.8 (C), 77.2 (CH), 38.2 (CH<sub>2</sub>), 32.8 (CH), 25.2 (CH<sub>3</sub>), 21.9 (CH<sub>3</sub>), 17.3 (CH<sub>3</sub>), 17.2 (CH<sub>3</sub>);  $[\text{M}+\text{H}]^+ = 233.1902$  required  $[\text{M}+\text{H}]^+ = 233.1900$ .

### ((2-Butoxybut-3-en-2-yl)benzene **15**

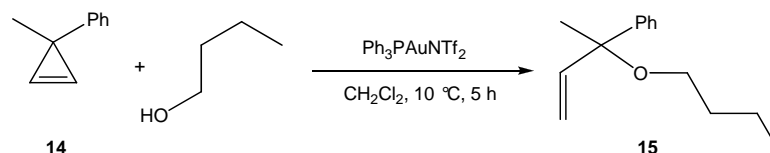

$\text{Ph}_3\text{PAuNTf}_2$  (as the 2:1 toluene adduct) (6.4 mg,  $8.09 \times 10^{-6}$  mol) was added to a solution of (1-methylcycloallyl)benzene **14** (20.0 mg, 0.154 mmol), butan-1-ol (0.21 mL, 2.310 mmol) and dichloromethane (0.3 mL). The reaction mixture was allowed to stir for 5 h at  $10\text{ }^\circ\text{C}$ . Then, the solvent was evaporated and the residue was purified by flash column chromatography (99.2% n-pentane, 0.8% diethyl ether) to yield ((2-butoxybut-3-en-2-yl)benzene **15** (20.4 mg, 0.100 mmol, 65%) as a colourless oil.

$\delta_{\text{H}}$  (400 MHz,  $\text{CDCl}_3$ ) 7.45 (2H, m, Ar-H), 7.35-7.25 (3H, m, Ar-H), 6.04 (1H, dd,  $J = 17.5, 10.7$ ,  $\text{HC}=\text{CH}_2$ ), 5.27 (1H, dd,  $J = 17.5, 1.4$ ,  $\text{HC}=\text{CHH}$ ), 5.23 (1H, dd,  $J = 10.7, 1.4$ ,  $\text{HC}=\text{CHH}$ ), 3.32 (2H, m, O- $\text{CH}_2$ ), 1.62 (3H, s, O-C- $\text{CH}_3$ ), 1.40 (2H, m,  $\text{CH}_2$ ), 0.93 (5H, m,  $\text{CH}_2\text{CH}_3$ );  $\delta_{\text{C}}$  (100 MHz,  $\text{CDCl}_3$ ) 145.3 (C), 143.4 (CH), 128.0 (CH), 126.8 (CH), 126.2 (CH), 114.0 ( $\text{CH}_2$ ), 78.7 (C), 62.4 ( $\text{CH}_2$ ), 32.6 ( $\text{CH}_2$ ), 24.3 ( $\text{CH}_3$ ), 19.5 ( $\text{CH}_2$ ), 14.0 ( $\text{CH}_3$ );  $[\text{M}+\text{H}]^+(\text{EI}) = 205.1587$  required  $[\text{M}+\text{H}]^+ = 205.1587$ .



**(E)-(4-Phenethoxybut-2-en-2-yl)benzene 16**

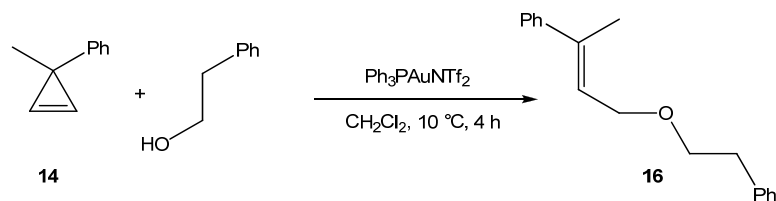

$\text{Ph}_3\text{PAuNTf}_2$  (as the 2:1 toluene adduct) (6.4 mg,  $8.09 \times 10^{-6}$  mol) was added to a solution of (1-methylcycloallyl)benzene **14** (20.0 mg, 0.154 mmol), 2-phenylethanol (0.28 mL, 2.310 mmol) and dichloromethane (0.3 mL). The reaction mixture was allowed to stir for 4 h at  $10\text{ }^\circ\text{C}$ . Then, the solvent was evaporated and the residue was purified by flash column chromatography (98% n-pentane, 2% diethyl ether) to yield (E)-(4-phenethoxybut-2-en-2-yl)benzene **16** (25.3 mg, 0.100 mmol, 65%) as a colourless oil.

$\nu_{\text{max}}/\text{cm}^{-1}$  1648 vw (C=C), 1602 w, 1495 m, 1453 m, (Ar C=C), 1097 s (C-O);  $\delta_{\text{H}}$  (400 MHz,  $\text{CDCl}_3$ ) 7.45 – 7.17 (10H, m, Ar-H), 5.95 (1H, tq,  $J = 6.5, 1.4$ , C=CH), 4.25 (2H, d,  $J = 6.6$ , HC-CH<sub>2</sub>-O), 3.74 (2H, t,  $J = 7.3$ , O-CH<sub>2</sub>CH<sub>2</sub>), 2.97 (2H, t,  $J = 7.3$ , O-CH<sub>2</sub>CH<sub>2</sub>), 2.09 (3H, d,  $J = 1.4$ , CH<sub>3</sub>);  $\delta_{\text{C}}$  (100 MHz,  $\text{CDCl}_3$ ) 143.0 (C), 139.0 (C), 138.1 (C), 128.9 (CH), 128.4 (CH), 128.2 (CH), 127.2 (CH), 126.2 (CH), 125.8 (CH), 124.5 (CH), 71.4 (CH<sub>2</sub>), 68.0 (CH<sub>2</sub>), 36.5 (CH<sub>2</sub>), 16.2 (CH<sub>3</sub>);  $[\text{M} + \text{NH}_4]^+ = 270.1853$  required  $M = 270.1852$ .

*E* Stereochemistry confirmed by 400 MHz NOESY:

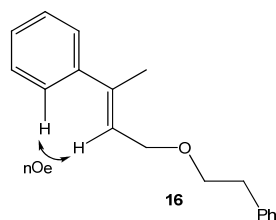

## 2-Methyl-4-(3-methyldodec-1-en-3-yloxy)butan-2-ol **18**

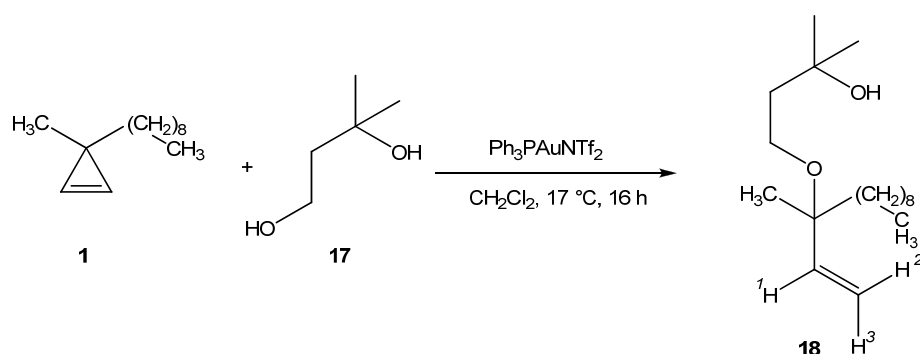

Ph<sub>3</sub>PAuNTf<sub>2</sub> (as the 2:1 toluene adduct) (5.8 mg, 7.8 × 10<sup>-6</sup> mol) was added to a solution of 3-methyl-3-nonylcycloprop-1-ene **1** (50.4 mg, 0.28 mmol), 3-methyl-1,3-butandiol (90 μL, 0.84 mmol), and dichloromethane (0.5 mL). The reaction mixture was allowed to stir for 16 h at 17 °C. Then, the solvent was evaporated and the residue was purified by flash column chromatography (6:1 n-pentane / diethyl ether) to yield 2-methyl-4-(3-methyldodec-1-en-3-yloxy)butan-2-ol **18** (45.6 mg, 0.16 mmol, 58%) as a colourless oil.

$\nu_{\max}/\text{cm}^{-1}$  3452 br (OH), 1632 vw (C=C), 1076 s (C-O);  $\delta_{\text{H}}$  (200 MHz, CDCl<sub>3</sub>) 5.75 (1H, dd,  $J = 17.5, 11.0$ , H-1), 5.16 (1H, dd,  $J = 11.0, 1.3$ , H-3), 5.08 (1H, dd,  $J = 17.5, 1.3$ , H-2), 3.92 (1H, s, OH), 3.52 (2H, m, H<sub>2</sub>C-O), 1.68 (2H, t,  $J = 5.8$ , H<sub>2</sub>C-(CH<sub>2</sub>)-C) 1.59 – 1.10 (25H, m, alkyl-H), 0.84 (3H, t,  $J = 6.1$ , CH<sub>2</sub>CH<sub>3</sub>);  $\delta_{\text{C}}$  (100 MHz, CDCl<sub>3</sub>) 142.6 (CH), 114.8 (CH<sub>2</sub>), 77.9 (C), 70.6 (C), 59.6 (CH<sub>2</sub>), 41.5 (CH<sub>2</sub>), 40.2 (CH<sub>2</sub>), 31.9 (CH<sub>2</sub>), 30.1 (CH<sub>2</sub>), 29.6 (CH<sub>2</sub>), 29.5 (CH<sub>2</sub>), 29.3 (CH<sub>3</sub>), 29.2 (CH<sub>3</sub>), 23.6 (CH<sub>2</sub>), 22.7 (CH<sub>2</sub>), 21.4 (CH<sub>3</sub>), 14.1 (CH<sub>3</sub>);  $[\text{M}+\text{Na}]^+$  (ESI) = 307.2604 required  $[\text{M}+\text{Na}]^+ = 307.2608$ .

### 2,2-Dimethyl-3-(3-methyldodec-1-en-3-yloxy)propan-1-ol **20**

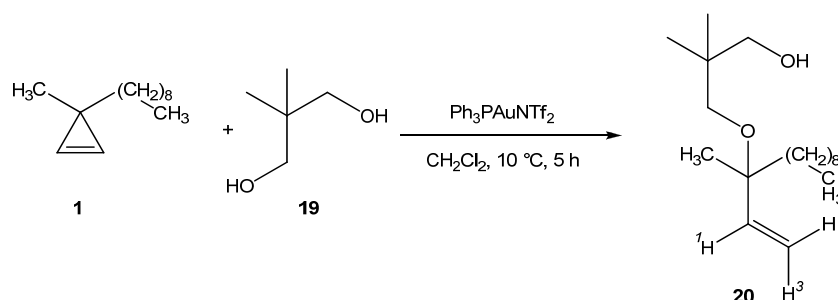

Ph<sub>3</sub>PAuNTf<sub>2</sub> (as the 2:1 toluene adduct) (5.8 mg, 7.35 x 10<sup>-6</sup> mol) was added to a solution of 3-methyl-3-nonylcycloprop-1-ene **1** (25.2 mg, 0.14 mmol), neopentyl glycol (87.4 mg, 0.84 mmol), and dichloromethane (0.3 mL). The reaction mixture was allowed to stir for 5 h at 10 °C. Then, the solvent was evaporated and the residue was purified by flash column chromatography (7:1 n-pentane / diethyl ether) to yield 2,2-Dimethyl-3-(3-methyldodec-1-en-3-yloxy)propan-1-ol **20** (13.0 mg, 0.046 mmol, 33%) as a colourless oil.

$\nu_{\max}/\text{cm}^{-1}$  3383 br (OH), 1639 vw (C=C), 1070 s (C-O);  $\delta_{\text{H}}$  (400 MHz, CDCl<sub>3</sub>) 5.74 (1H, dd,  $J = 17.6, 10.9$ , H-1), 5.16 (1H, dd,  $J = 11.0, 1.3$ , H-3), 5.10 (1H, dd,  $J = 17.6, 1.3$ , H-2), 3.44 (2H, d,  $J = 5.2$ , OCH<sub>2</sub>), 3.20 – 3.12 (3H, m, OCH<sub>2</sub> and OH), 1.56 – 1.47 (2H, m, CH<sub>2</sub>), 1.37 – 1.23 (14H, m, alkyl-H), 1.22 (3H, s, CH<sub>3</sub>), 0.91 (3H, s, CH<sub>3</sub>), 0.90 (3H, s, CH<sub>3</sub>), 0.88 (3H, t,  $J = 6.9$  Hz, CH<sub>2</sub>CH<sub>3</sub>);  $\delta_{\text{C}}$  (101 MHz, CDCl<sub>3</sub>) 142.9 (CH), 114.7 (CH<sub>2</sub>), 77.5 (C), 72.9 (CH<sub>2</sub>), 72.2 (CH<sub>2</sub>), 40.1 (CH<sub>2</sub>), 35.6 (C), 31.9 (CH<sub>2</sub>), 30.3 (CH<sub>2</sub>), 30.1 (CH<sub>2</sub>), 29.6 (CH<sub>2</sub>), 29.3 (CH<sub>2</sub>), 23.6 (CH<sub>2</sub>), 22.7 (CH<sub>2</sub>), 22.1 (CH<sub>3</sub>), 22.0 (CH<sub>3</sub>), 21.6 (CH<sub>3</sub>), 14.1 (CH<sub>3</sub>); [M+Na]<sup>+</sup> (ESI) = 307.2611 required [M+Na]<sup>+</sup> = 307.2608.

**((2*R*)-1-(3-Methyldodec-1-en-3-yloxy)propan-2-yl)benzene **22****

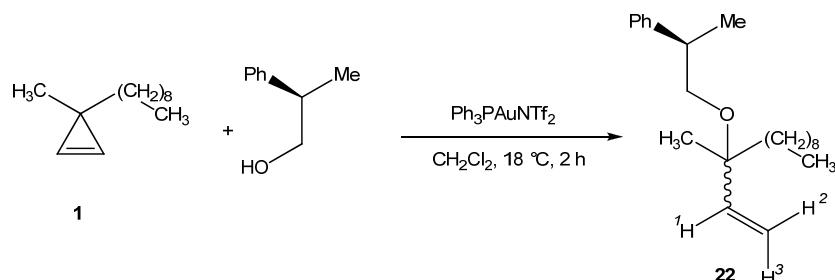

$\text{Ph}_3\text{PAuNTf}_2$  (as the 2:1 toluene adduct) (5.8 mg,  $7.37 \times 10^{-6}$  mol) was added to a solution of 3-methyl-3-nonylcycloprop-1-ene **1** (25.2 mg, 0.140 mmol) and (*R*)-2-phenyl-1-propanol (0.12 mL, 0.84 mmol) in dichloromethane (0.3 mL). The reaction mixture was allowed to stir for 2 h at 18 °C. Then, the solvent was evaporated and the residue was purified by flash column chromatography (98% *n*-pentane, 2% diethyl ether) to yield a 1:1 inseparable mixture of the diastereomers **22** (28.7 mg, 0.0908 mmol, 65%) as a colourless oil.

$\nu_{\text{max}}/\text{cm}^{-1}$  1635 vw (C=C), 1604 vw, 1495 w, 1453 m, (Ar C=C), 1080 s (C-O);  $\delta_{\text{H}}$  (400 MHz,  $\text{CDCl}_3$ ) 7.09-7.23 (5H x 2, m, Ar-H), 5.64 (1H, dd,  $J = 17.6, 10.8$ , H-1), 5.58 (1H, dd,  $J = 17.6, 10.8$ , H-1'), 5.04-4.93 (2H x 2, m, H-2, H-3), 3.34-3.27 (1H x 2, m, CHHO), 3.22-3.15 (1H x 2, m, CHHO), 2.88-2.79 (1H x 2, m, CHPh), 1.35-1.45 (2H x 2, m,  $\text{CH}_2$ ), 1.23-1.14 (17H x 2, m,  $\text{CH}_2, \text{CH}_3$ ), 1.10 (3H x 2,  $J = 11.2$ ,  $\text{CH}_3\text{CHPh}$ ), 0.81 (3H, t,  $J = 6.4$ ,  $\text{CH}_2\text{CH}_3$ );  $\delta_{\text{C}}$  (100 MHz,  $\text{CDCl}_3$ ) 145.0 (C), 144.95 (C), 143.69 (CH), 143.66 (CH), 128.14 (CH), 128.12 (CH), 127.49 (CH), 127.47 (CH), 126.1 (CH x 2), 114.1 ( $\text{CH}_2$ ), 114.0 ( $\text{CH}_2$ ), 77.2 (C), 77.1 (C), 69.2 ( $\text{CH}_2$  x 2), 40.6 (CH x 2), 40.2 ( $\text{CH}_2$ ), 40.0 ( $\text{CH}_2$ ), 31.9 ( $\text{CH}_2$  x 2), 30.1 ( $\text{CH}_2$  x 2), 29.62 ( $\text{CH}_2$ ), 29.59 ( $\text{CH}_2$ ), 29.3 ( $\text{CH}_2$  x 2), 23.54 ( $\text{CH}_2$ ), 23.52 ( $\text{CH}_2$ ), 22.7 ( $\text{CH}_2$  x 2), 22.0 ( $\text{CH}_3$ ), 21.9 ( $\text{CH}_3$ ), 18.28 ( $\text{CH}_3$ ), 18.25 ( $\text{CH}_3$ ), 14.11 ( $\text{CH}_3$  x 2);  $[\text{M} + \text{NH}_4]^+$  (ESI) = 334.3106 required  $[\text{M} + \text{NH}_4]^+ = 334.3104$ .

**(R)-(1-(2-Methyl-1-phenylbut-3-en-2-yloxy)ethyl)benzene 24**

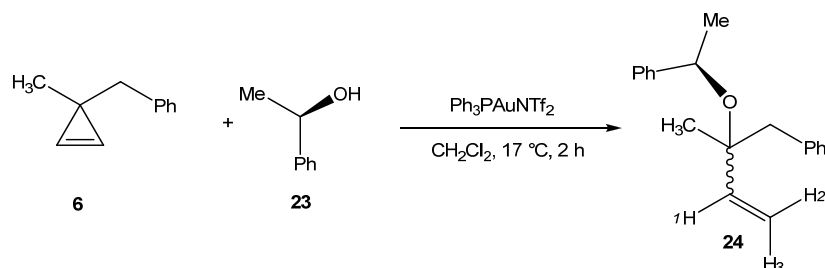

$\text{Ph}_3\text{PAuNTf}_2$  (as the 2:1 toluene adduct) (6.2 mg,  $7.88 \times 10^{-6}$  mol) was added to a solution of ((1-methylcycloallyl)methyl)benzene **6** (21.6 mg, 0.150 mmol) and (*R*)-sec-phenethyl alcohol (0.11 mL, 0.90 mmol) in dichloromethane (0.3 mL). The reaction mixture was allowed to stir for 2 h at  $17^\circ\text{C}$ . Then, the solvent was evaporated and the residue was purified by flash column chromatography (98% *n*-pentane, 2% diethyl ether) to yield a 1:1 inseparable mixture of the diastereomers **24** (18.2 mg, 0.0684 mmol, 46%, dr 1:1) as a yellow oil.

$\nu_{\text{max}}/\text{cm}^{-1}$  1668 vw (C=C), 1605 vw, 1493 w, 1452 m, (Ar C=C), 1091 s (C-O);  $\delta_{\text{H}}$  (400 MHz,  $\text{CDCl}_3$ ) 7.40 – 7.16 (5H x 2, m, Ar-H), 5.90 (1H, dd,  $J = 17.9, 10.9$ , H-1), 5.58 (1H, dd,  $J = 17.9, 10.6$ , H-1'), 5.23 (1H, dd,  $J = 10.9, 1.5$ , H-3), 5.10 (1H, dd,  $J = 17.9, 1.3$ , H-2), 5.00 (1H, dd,  $J = 17.9, 1.5$ , H-2'), 4.99 (1H, dd,  $J = 10.6, 1.5$ , H-3'), 4.60 (1H, m,  $\text{HCO}$ ), 2.90 (2H x 2, m,  $\text{CH}_2\text{Ph}$ ), 1.39 (3H, d,  $J = 6.5$ ,  $\text{H}_3\text{C-CH}$ ), 1.37 (3H, d,  $J = 6.5$ ,  $\text{H}_3\text{C-CH}$ ), 1.32 (3H, s,  $\text{CH}_3$ ), 0.96 (3H, s,  $\text{CH}_3$ );  $\delta_{\text{C}}$  (100 MHz,  $\text{CDCl}_3$ ) 147.6 (C), 147.0 (C), 143.2 (CH), 143.1 (CH), 137.7 (2 x C), 131.1 (CH), 131.1 (CH), 128.0 (CH), 128.0 (CH), 127.5 (CH), 127.5 (CH), 126.4 (CH), 126.1 (CH), 125.8 (2 x CH), 125.5 (2 x CH), 115.1 ( $\text{CH}_2$ ), 114.6, ( $\text{CH}_2$ ), 79.2 (C), 77.2 (C), 71.0 (CH), 70.7 (CH), 49.1 ( $\text{CH}_2$ ), 48.7 ( $\text{CH}_2$ ), 26.6 ( $\text{CH}_3$ ), 26.5 ( $\text{CH}_3$ ), 21.8 ( $\text{CH}_3$ ), 21.7 ( $\text{CH}_3$ );  $[\text{M} + \text{NH}_4]^+$  (ESI) = 284.2012 required  $[\text{M} + \text{NH}_4]^+ = 284.2009$ .

### Reaction with CD<sub>3</sub>OD

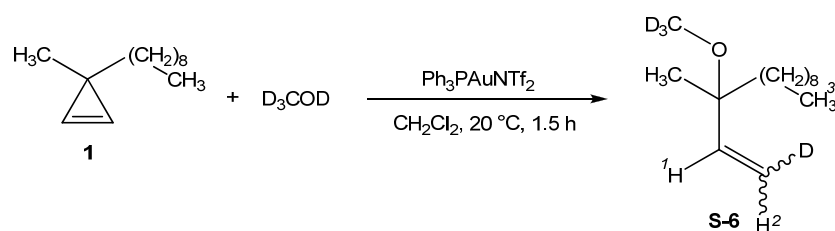

Ph<sub>3</sub>PAuNTf<sub>2</sub> (as the 2:1 toluene adduct) (4.4 mg, 5.6 × 10<sup>-6</sup> mol) was added to a solution of 3-methyl-3-nonylcycloprop-1-ene **1** (100 mg, 0.555 mmol) and d<sub>4</sub>-methanol (0.14 mL, 3.33 mmol) in dichloromethane (1 mL) with 3 Å molecular sieves. The reaction mixture was allowed to stir for 1.5 h at 20 °C. The solvent was evaporated and the product purified by column chromatography (diethyl ether) to yield **S-3** (47 mg, 0.22 mmol, 40%) as a mixture of the *E* and *Z* isomers (ratio 1:1, 90% D incorporation) as a colourless oil.

$\nu_{\max}/\text{cm}^{-1}$  2198 w (C-D), 2063 m (C-D), 1639 vw (C=C), 1117 s (C-O);  $\delta_{\text{H}}$  (400 MHz, CDCl<sub>3</sub>) 5.77 – 5.70 (1H, m, H-1), 5.15 (1H, d,  $J = 10.9$ , H-2<sub>cis</sub>), 5.09 (1H, d,  $J = 17.7$ , H-2<sub>trans</sub>), 1.55 – 1.20 (19H, m, alkyl-H), 0.87 (3H, t,  $J = 6.7$ , H-3);  $\delta_{\text{C}}$  (50 MHz, CDCl<sub>3</sub>) 142.9 (CH=CHD), 114.2 (t,  $J = 24.0$ , CH=CHD), 77.3 (COCD<sub>3</sub>), 49.1 (septet,  $J = 21.4$ , CD<sub>3</sub>), 39.7 (CH<sub>2</sub>), 31.9 (CH<sub>2</sub>), 30.2 (CH<sub>2</sub>), 29.6 (CH<sub>2</sub>), 29.3 (CH<sub>2</sub>), 23.6 (CH<sub>2</sub>), 22.7 (CH<sub>2</sub>), 21.3 (CH<sub>3</sub>), 14.1 (CH<sub>3</sub>); M<sup>+</sup>(EI) = 216.2.

## Control Reactions

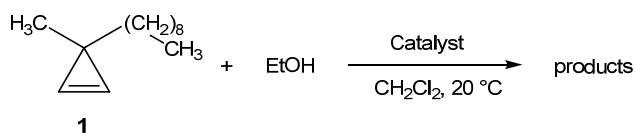

### *Catalyst: Trifluoromethanesulfonic acid*

Trifluoromethanesulfonic acid (21  $\mu$ L of a 0.666 M solution in dichloromethane, 14.0  $\mu$ mol) were added to a solution of 3-methyl-3-nonylcycloprop-1-ene **1** (48.9 mg, 0.271 mmol) and ethanol (77.2 mg, 1.68 mmol) in dichloromethane (0.5 mL). The reaction mixture was allowed to stir at 20 °C. After 1.5 h the reaction was monitored by TLC (eluent: 90% petrol ether, 10% diethyl ether) and there was no sign of any product formed. After a further 22.5 h at 20 °C the solvent was evaporated and the residue was filtered through a silica short plug (diethyl ether). Analysis of the crude mixture by <sup>1</sup>H-NMR (200 MHz, CDCl<sub>3</sub>) showed that no reaction took place (>95% of starting material).

### *Catalyst: AgOTf*

AgOTf (3.7 mg, 14.4  $\mu$ mol) was added to a solution of 3-methyl-3-nonylcycloprop-1-ene **1** (48.3 mg, 0.268 mmol) and ethanol (70.1 mg, 1.72 mmol) in dichloromethane (0.5 mL). The reaction mixture was allowed to stir at 20 °C. After 1.5 h the reaction was monitored by TLC (eluent: 90% petrol ether, 10% diethyl ether) and only traces of product were detected. After a further 22.5 h at room temperature the solvent was evaporated and the residue was filtered through a silica short plug (diethyl ether) to give 48.4 mg of a mixture of unreacted **1:2b** (7:4 ratio) along with traces of **3b**, **25** and other unidentified by-products. The products were identified and ratios determined by <sup>1</sup>H-NMR (200 MHz, CDCl<sub>3</sub>).

### *Catalyst: Rh(OAc)<sub>2</sub>*

[Rh(OAc)<sub>2</sub>]<sub>2</sub> (3.1 mg, 7.01  $\mu$ mol) was added to a solution of 3-methyl-3-nonylcycloprop-1-ene **1** (47.3 mg, 0.262 mmol) and ethanol (76.3 mg, 1.66 mmol) in dichloromethane (0.5 mL). The reaction mixture was allowed to stir at 20 °C. After 1.5 h the reaction was monitored by TLC (eluent: 90% petrol ether, 10% diethyl ether) and only traces of

products were detected. After a further 22.5 h at 20 °C the solvent was evaporated and the residue was filtered through a silica short plug (diethyl ether) to give 18.4 mg of a mixture of **25** along with traces of **3b** and **2b**. The products were identified by <sup>1</sup>H-NMR (200 MHz, CDCl<sub>3</sub>) analysis of the crude mixture.

**Catalyst: AuCl<sub>3</sub>**

AuCl<sub>3</sub> (1.7 mg, 5.60 μmol) was added to a solution of 3-methyl-3-nonylcycloprop-1-ene **1** (21.7 mg, 0.120 mmol) and ethanol (34.7 mg, 0.753 mmol) in dichloromethane (0.2 mL). The reaction mixture was allowed to stir at 20 °C. After 1.5 h the reaction was monitored by TLC (eluent: 90% petrol ether, 10% diethyl ether) and only traces of product were detected. After a further 22.5 h at 20 °C the solvent was evaporated and the residue was filtered through a silica short plug (diethyl ether) to give 25.3 mg of a mixture mainly **25** along with traces of **2b**, **3b** and other unidentified by-products. The products were identified by <sup>1</sup>H-NMR (200 MHz, CDCl<sub>3</sub>) analysis of the crude mixture. Purification by column chromatography (9:1 hexane:ether) produced a mixture of **25** as a colourless oil (12 mg, 61 μmol, 50%).



### 3. $^1\text{H-NMR}$ Spectra of Synthesised Compounds

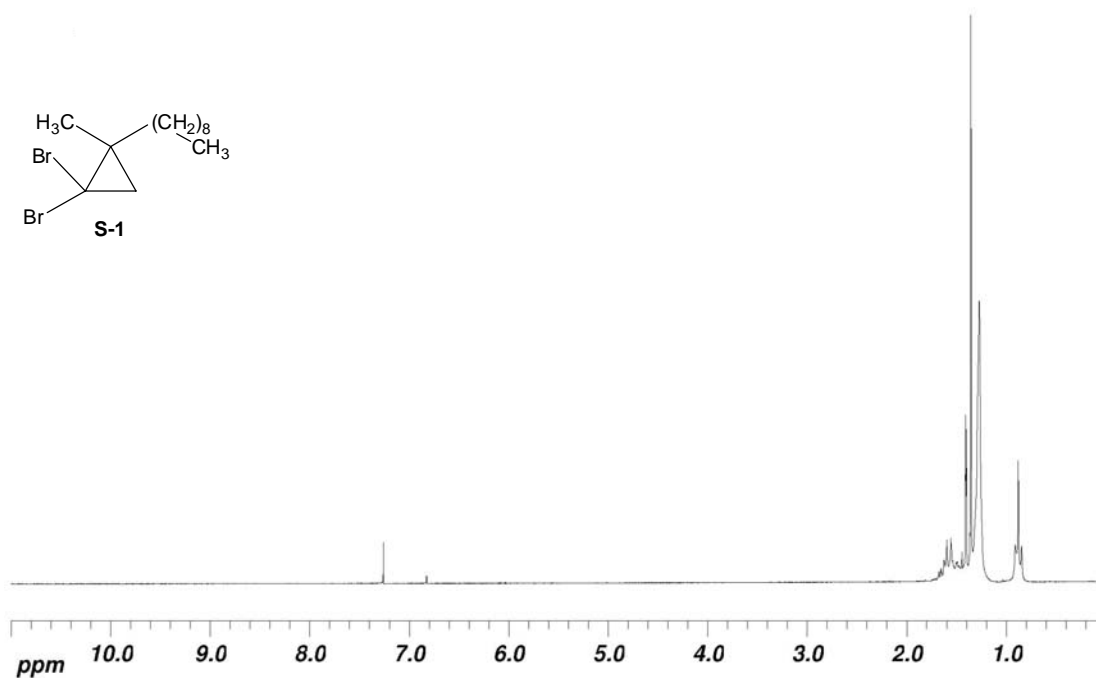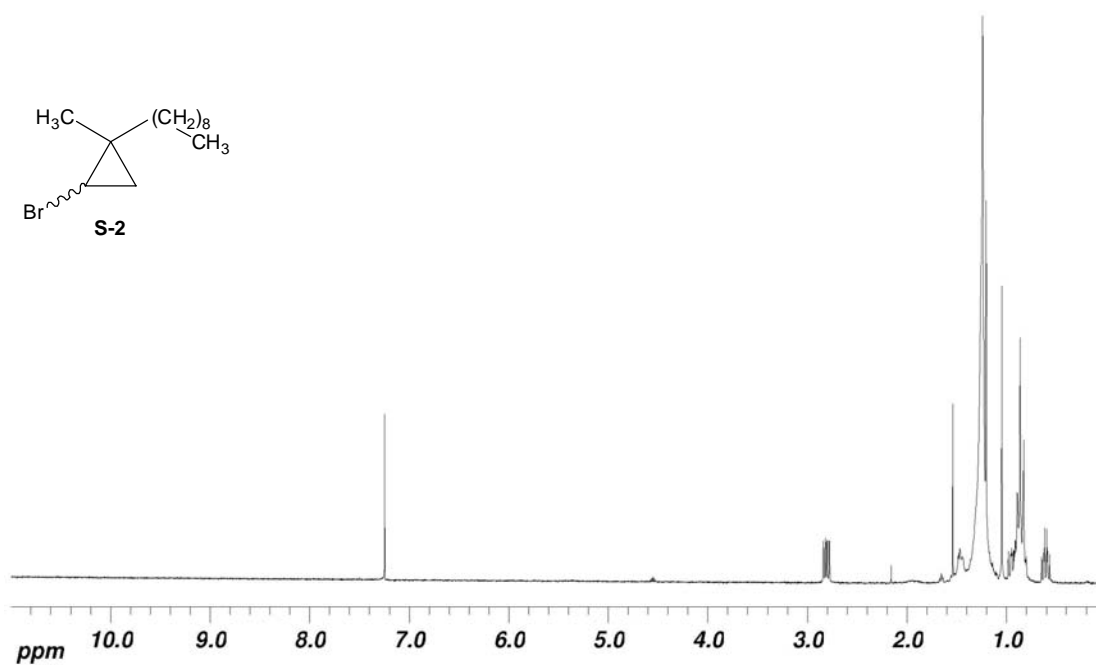

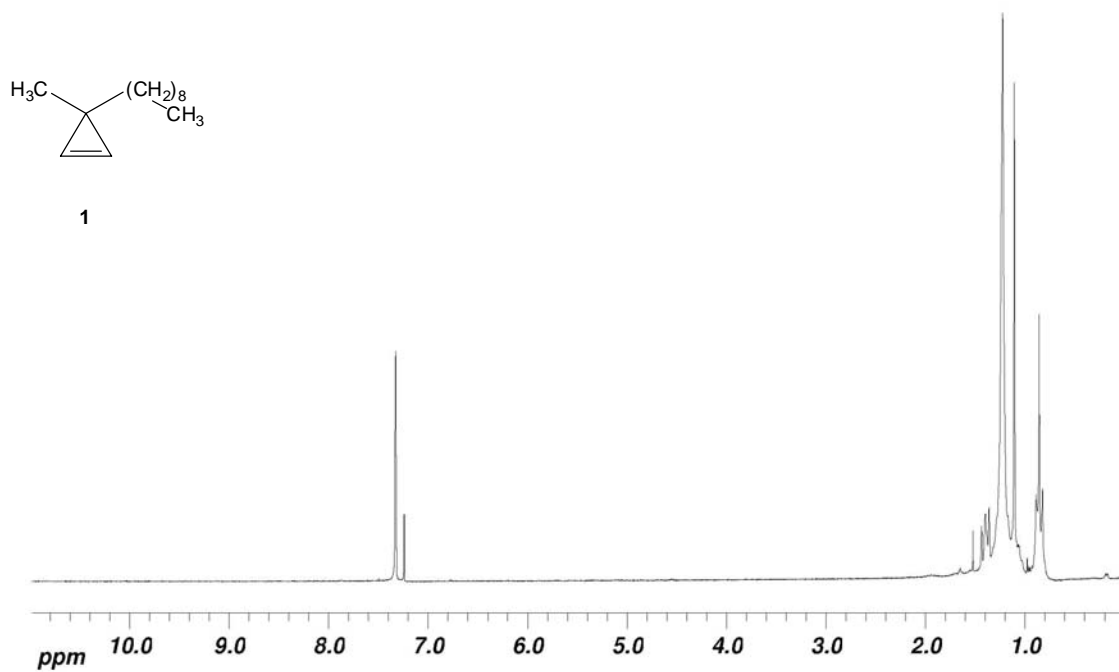

pegha027  
1H 400.1MHz Job 17581 Glen P E A027 CDCl3 25.0°C

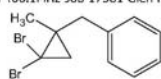

**S-3**

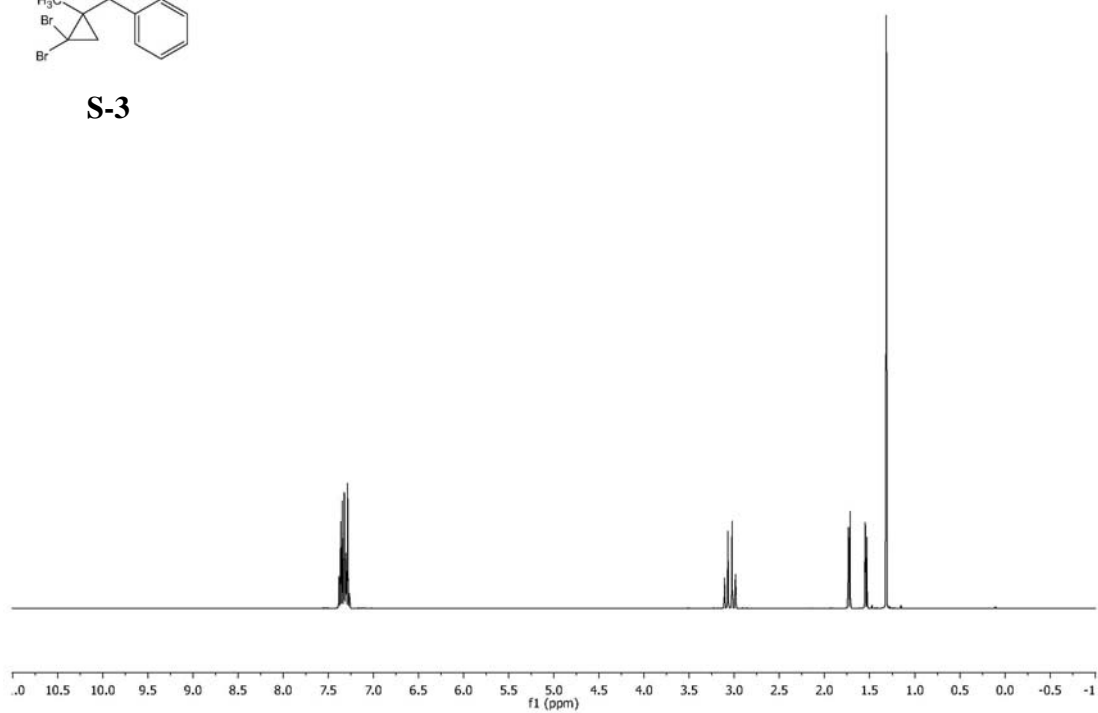

**S-4**

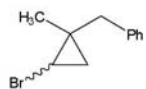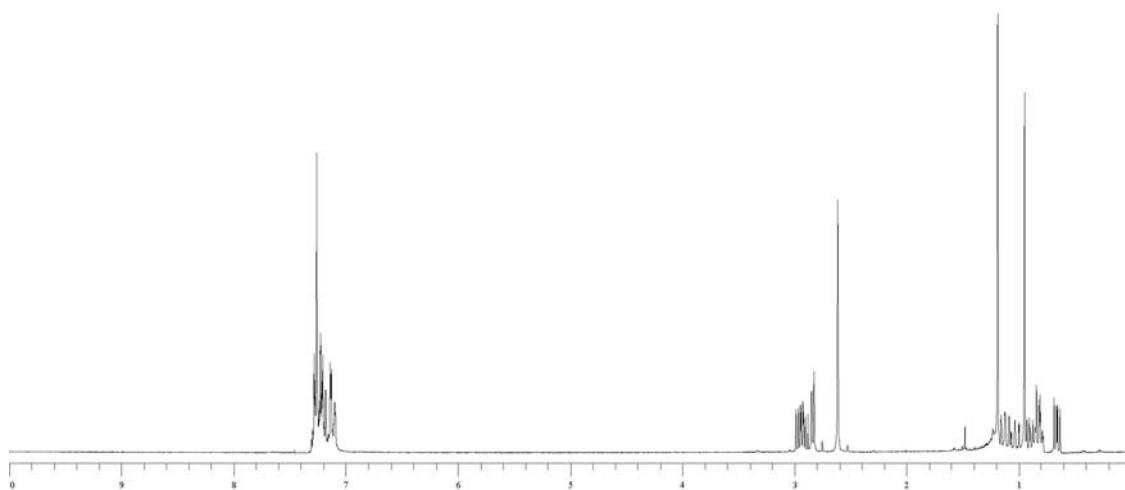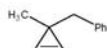

**6**

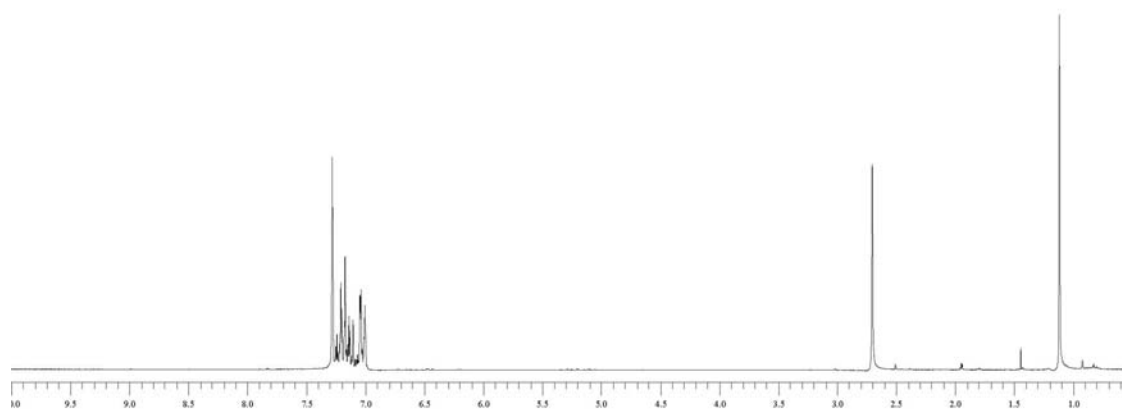

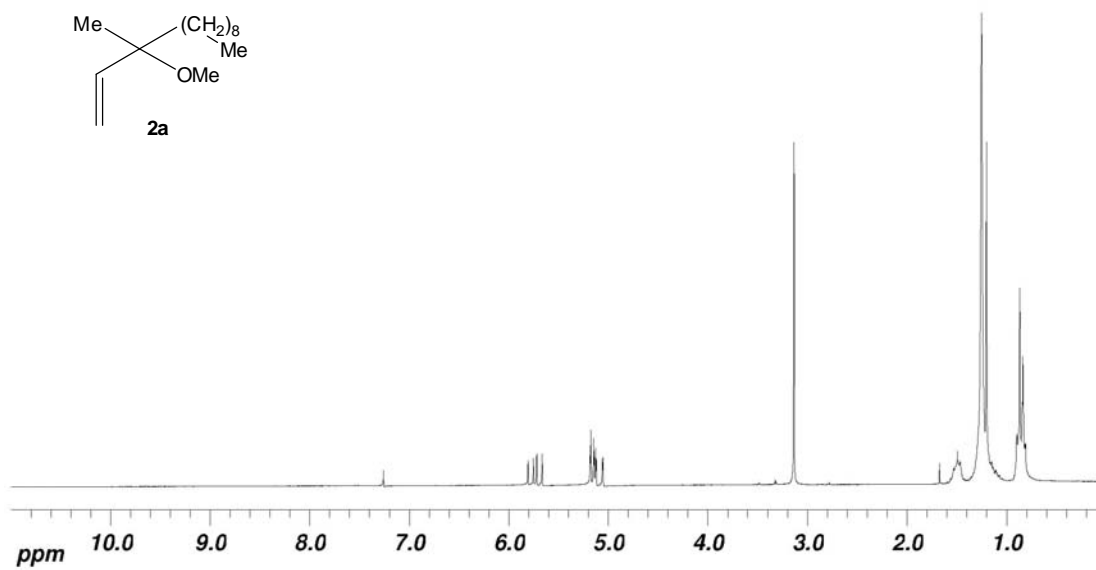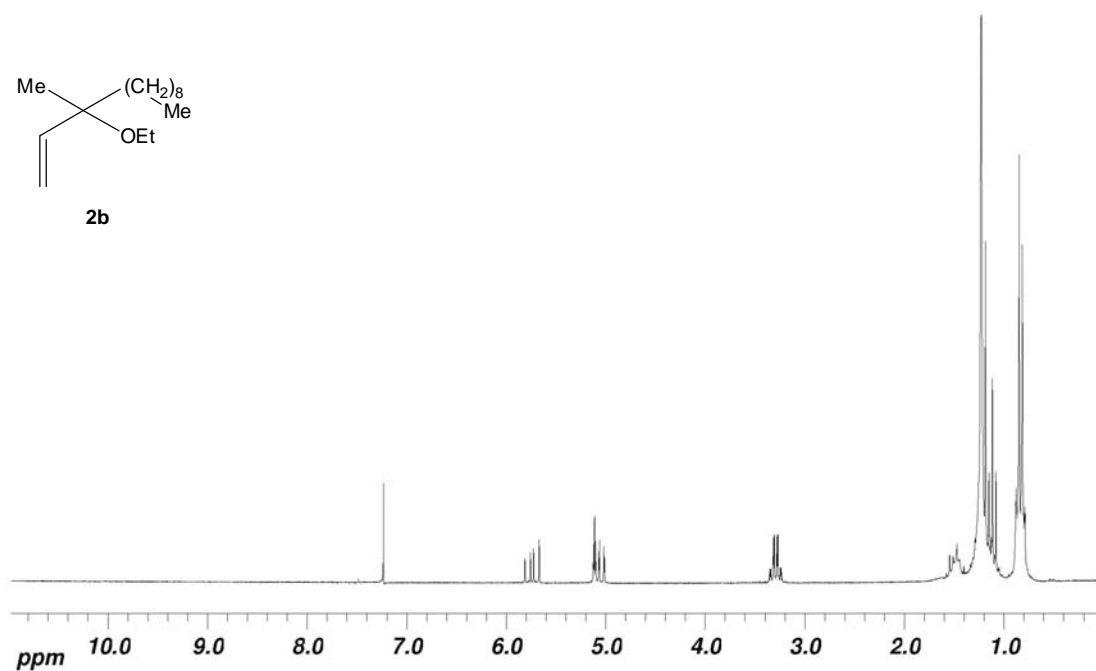

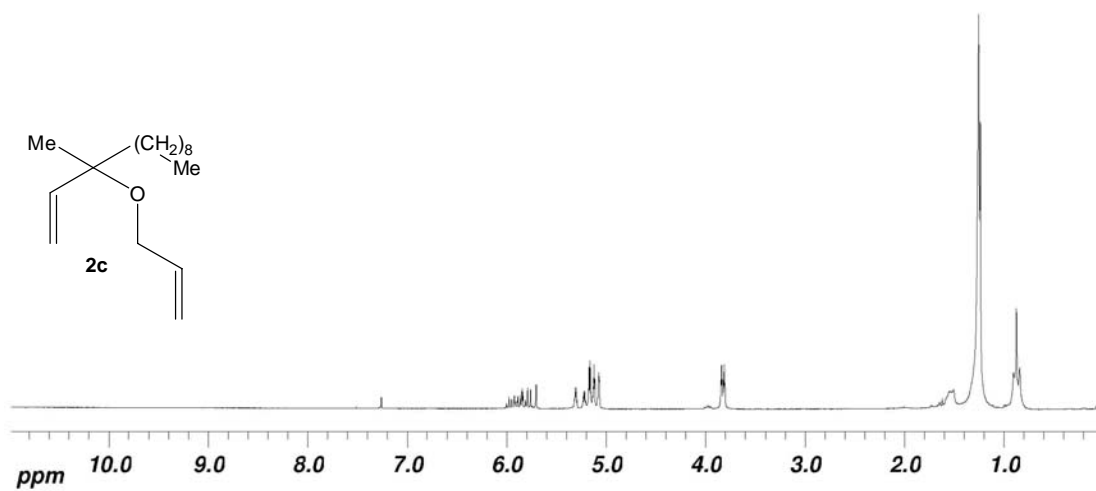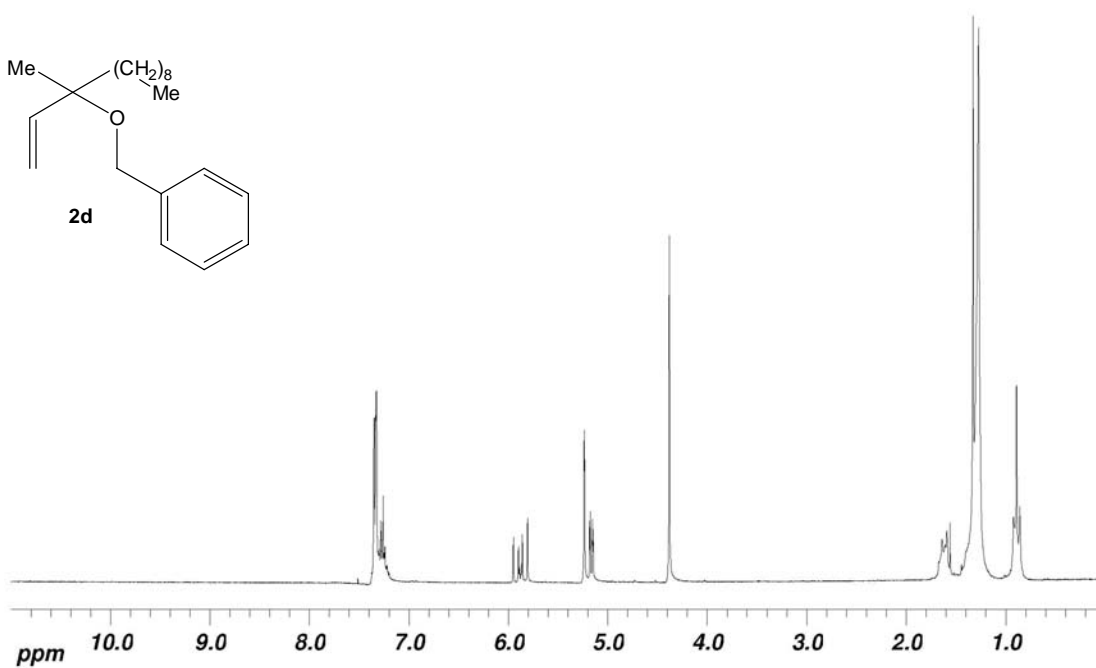

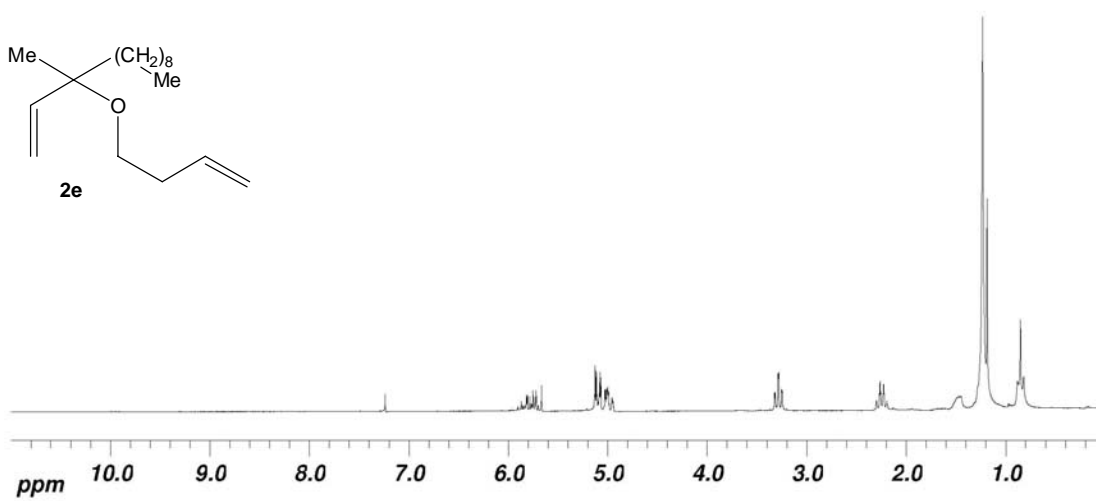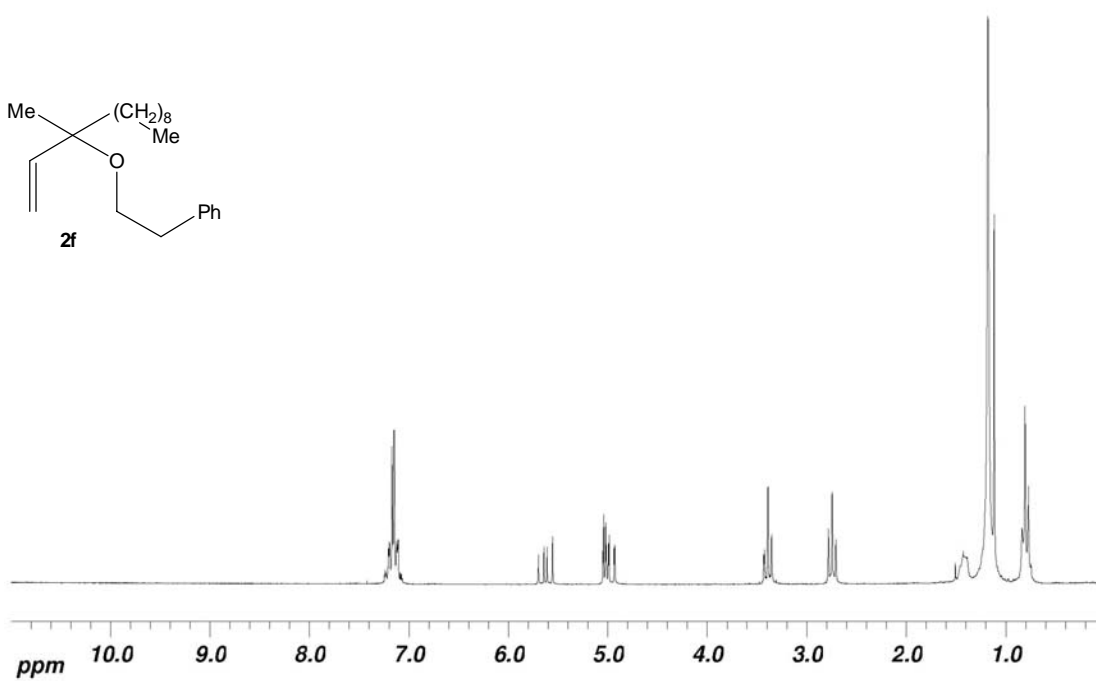

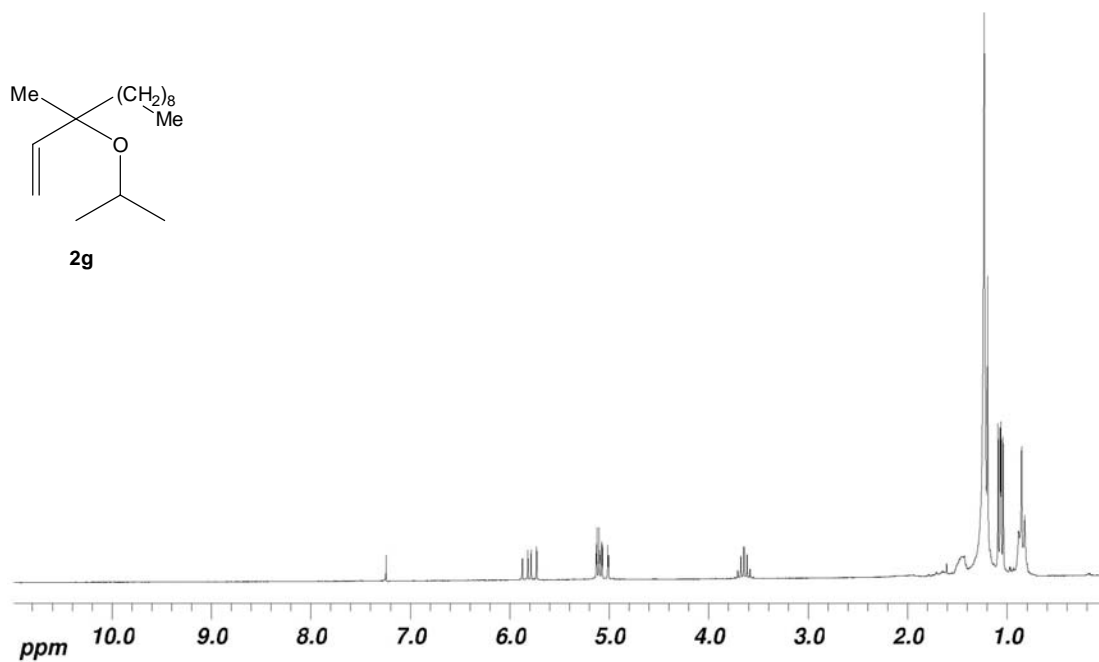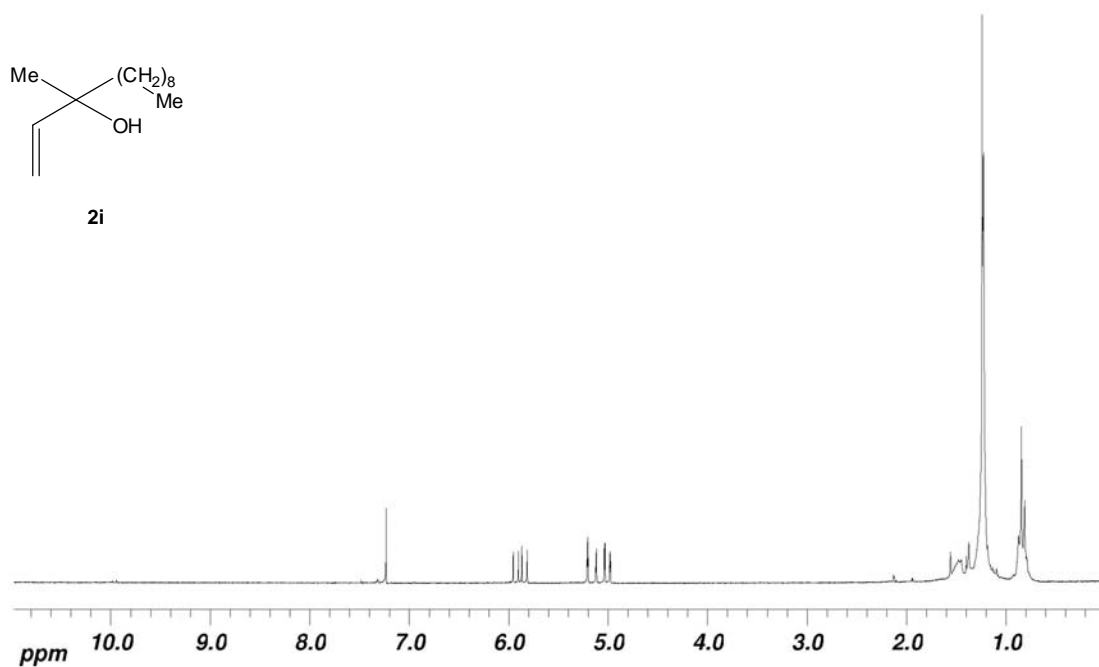

mshhb696  
1H 400.1MHz Job 17554 Hadfield M S B696 CDCl3 25.0°C

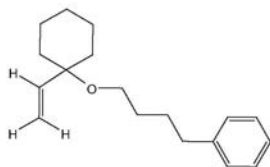

**5**

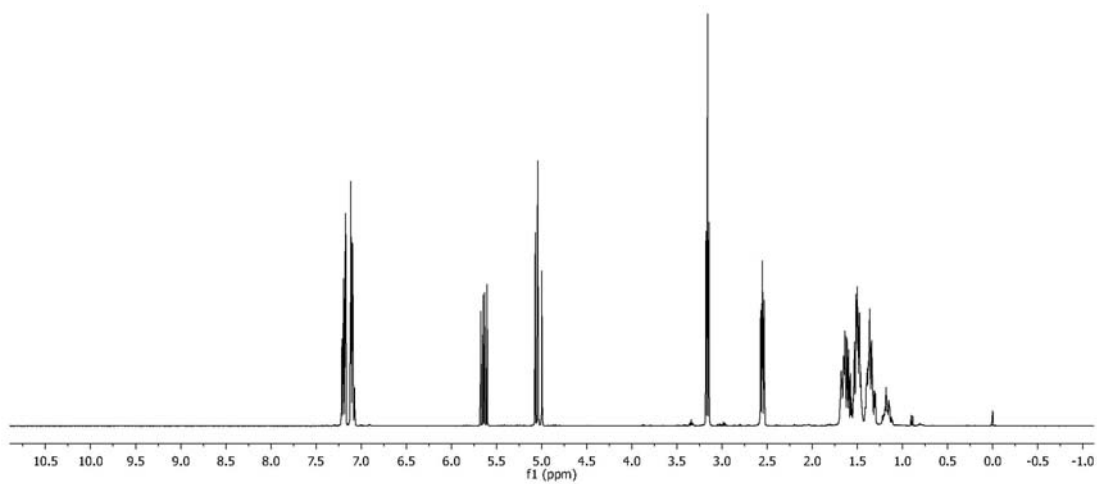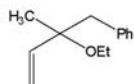

**7**

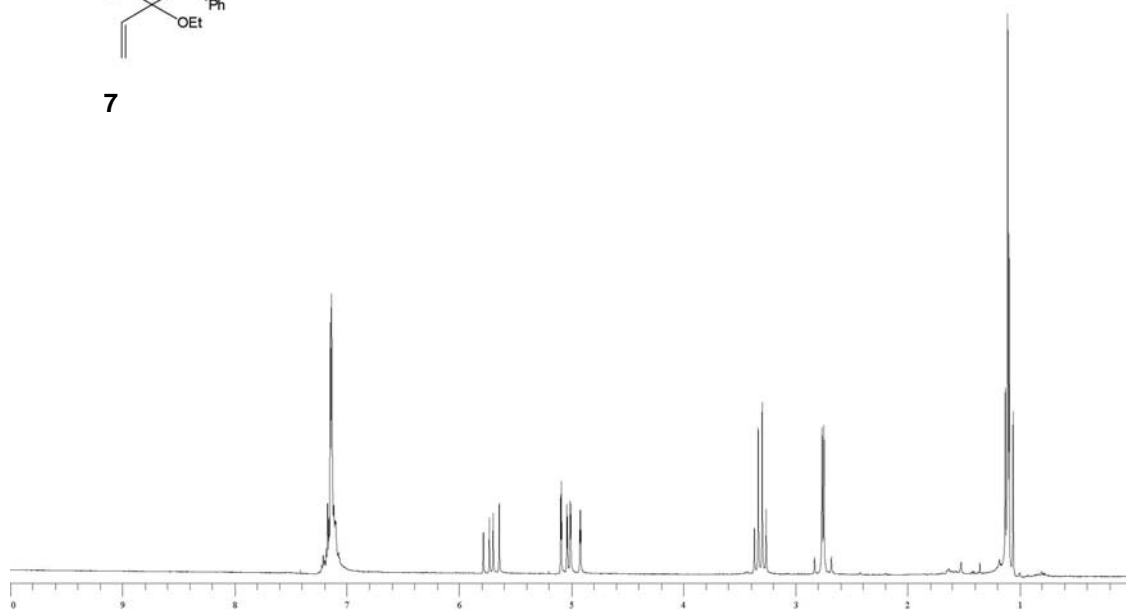



**8**

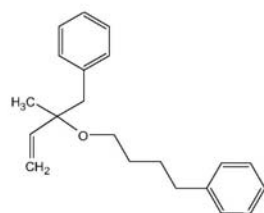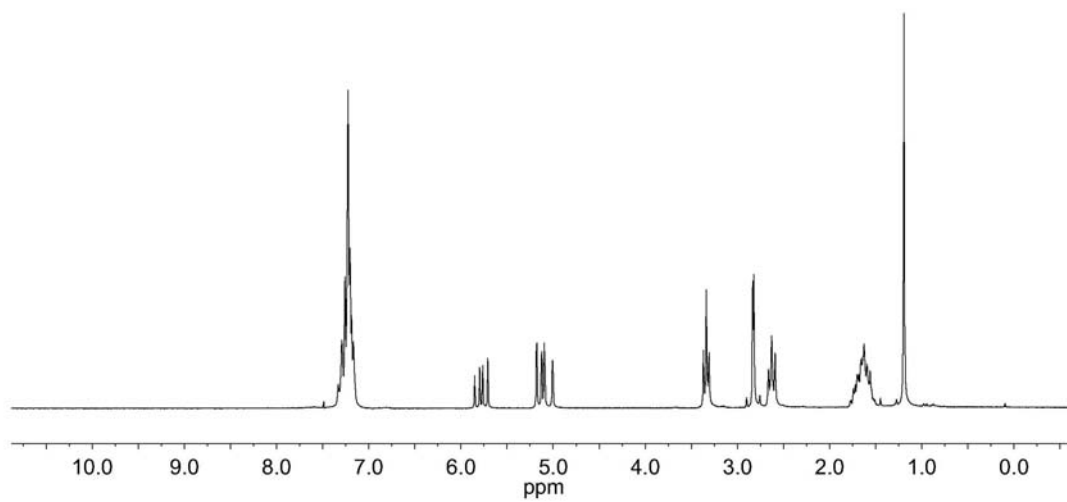

mshha687  
1H 400.1MHz Job 17546 Hadfield M S A687 CDCl3 25.0°C

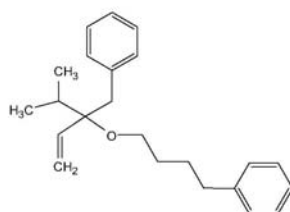

**10**

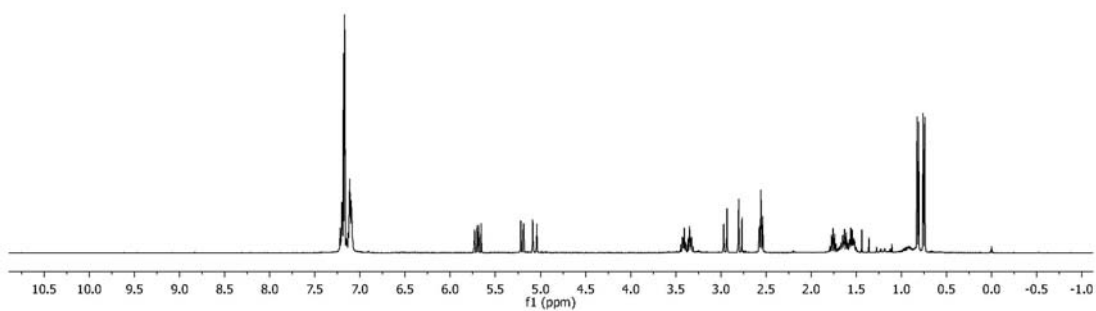

(200 MHz)

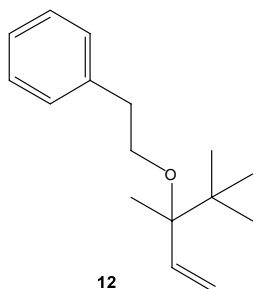

12

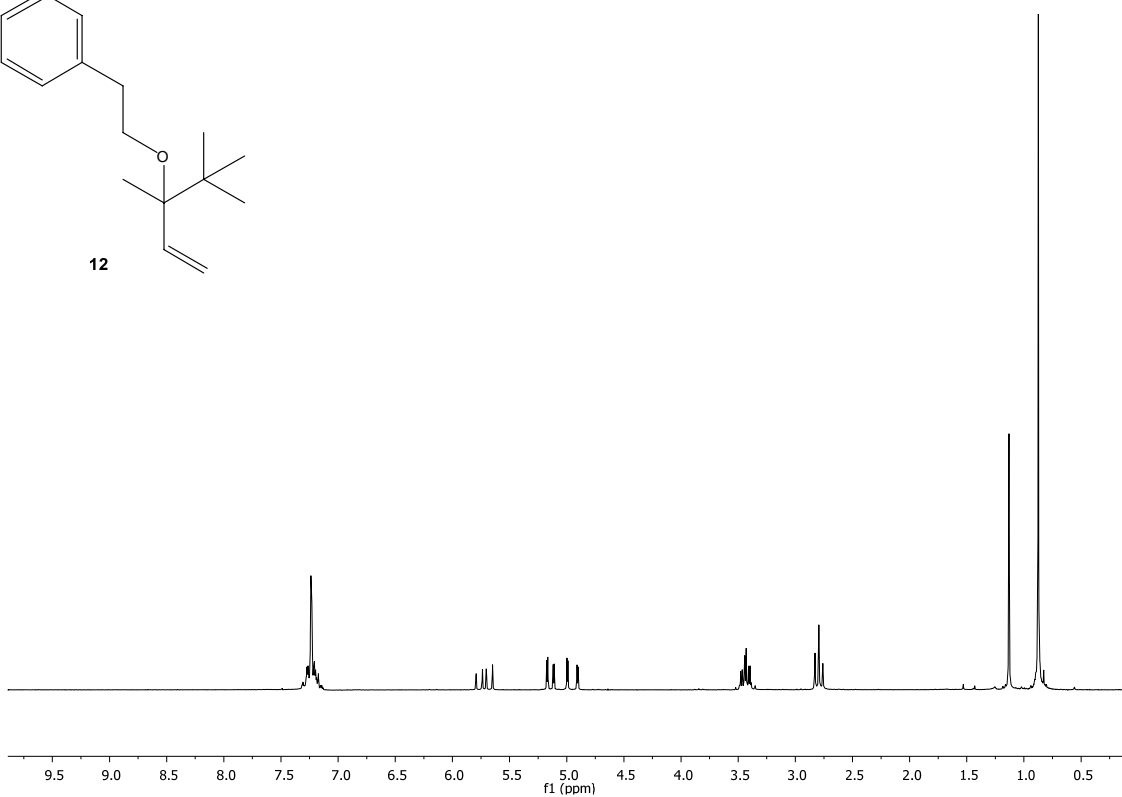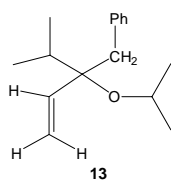

13

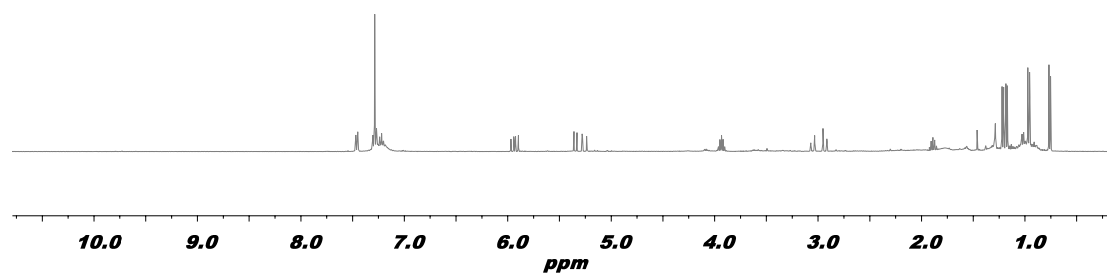

mshhc705  
1H 400.1MHz Job 17716 Hadfield M S C705 CDCl3 25.0°C

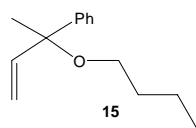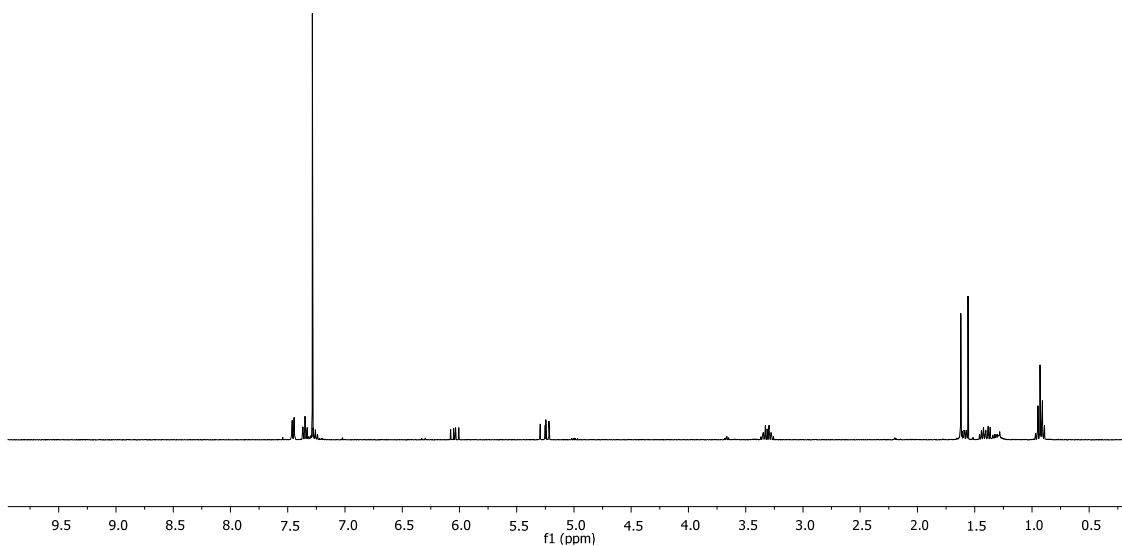

mshhc703  
1H 400.1MHz Job 17680 Hadfield M S C703 CDCl3 25.0°C

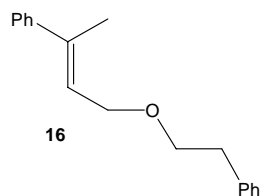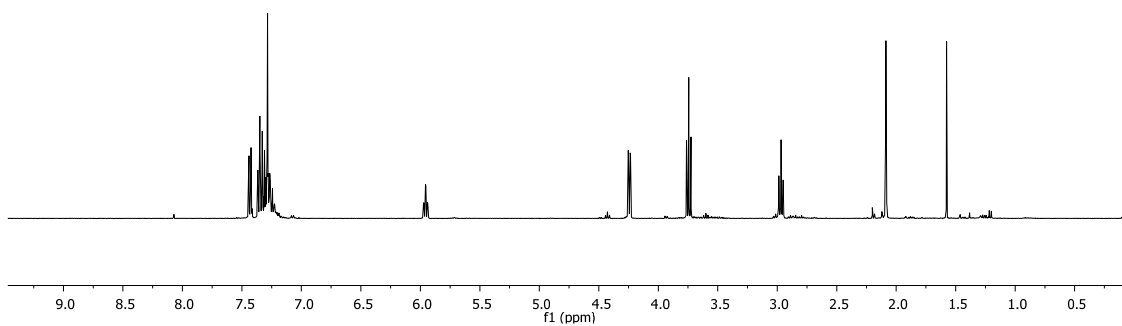

mshhb693  
1H 400.1MHz Job 17595 Hadfield M S B693 CDCl3 25.0°C

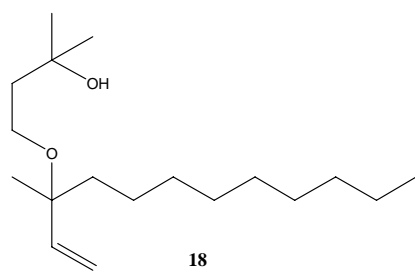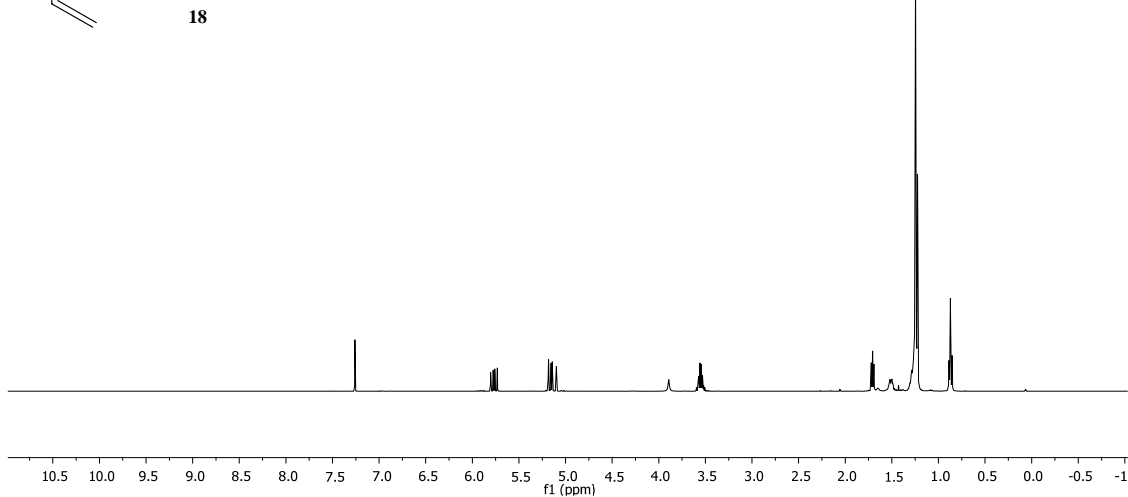

mshhb704  
1H 400.1MHz Job 17665 Hadfield M S B704 CDCl3 25.0°C

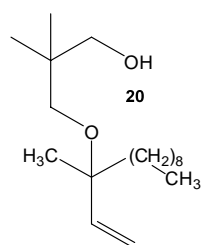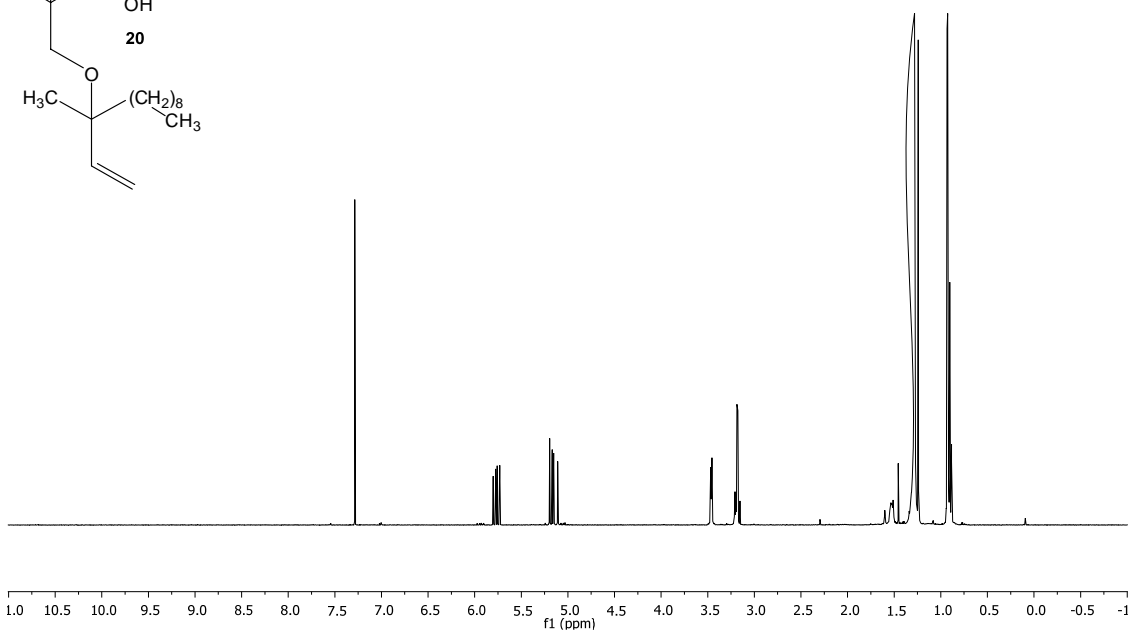

mshhb688  
1H 400.1MHz Job 17459 Hadfield M S B688 CDCl3 25.0°C

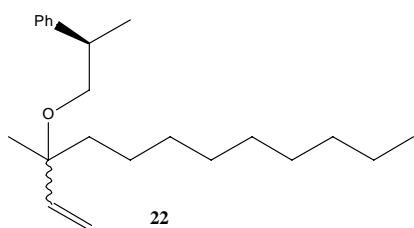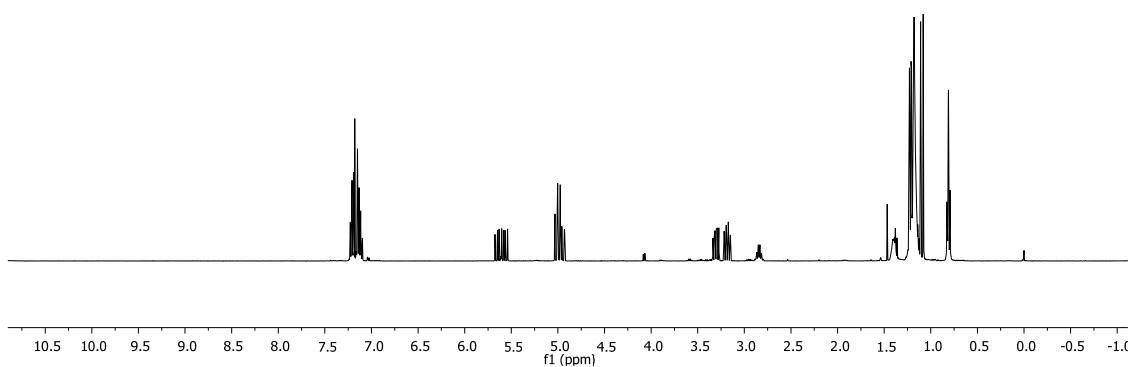

mshha708  
1H 400.1MHz Job 17686 Hadfield M S A708 CDCl3 25.0°C

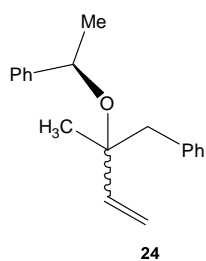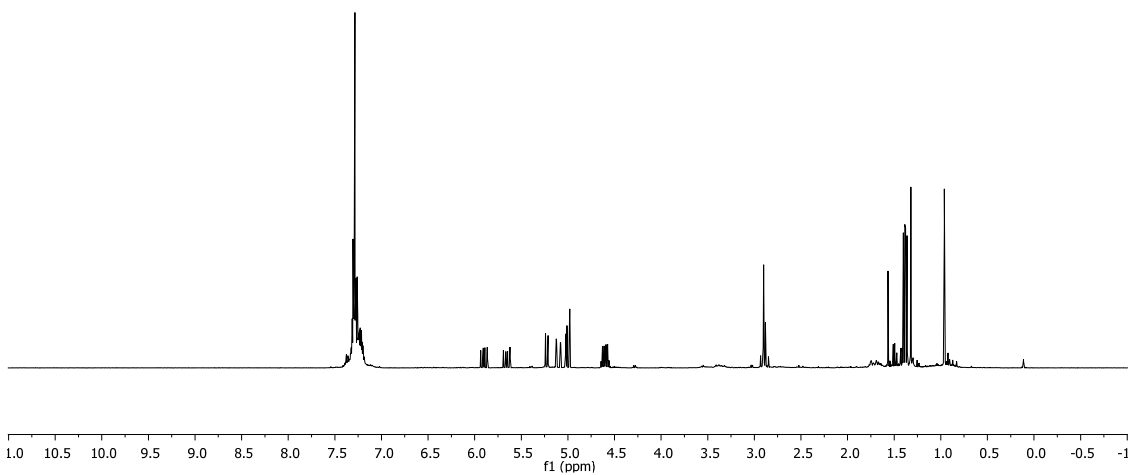

#### 4. $^{13}\text{C}$ -NMR Spectra of Synthesised Compounds

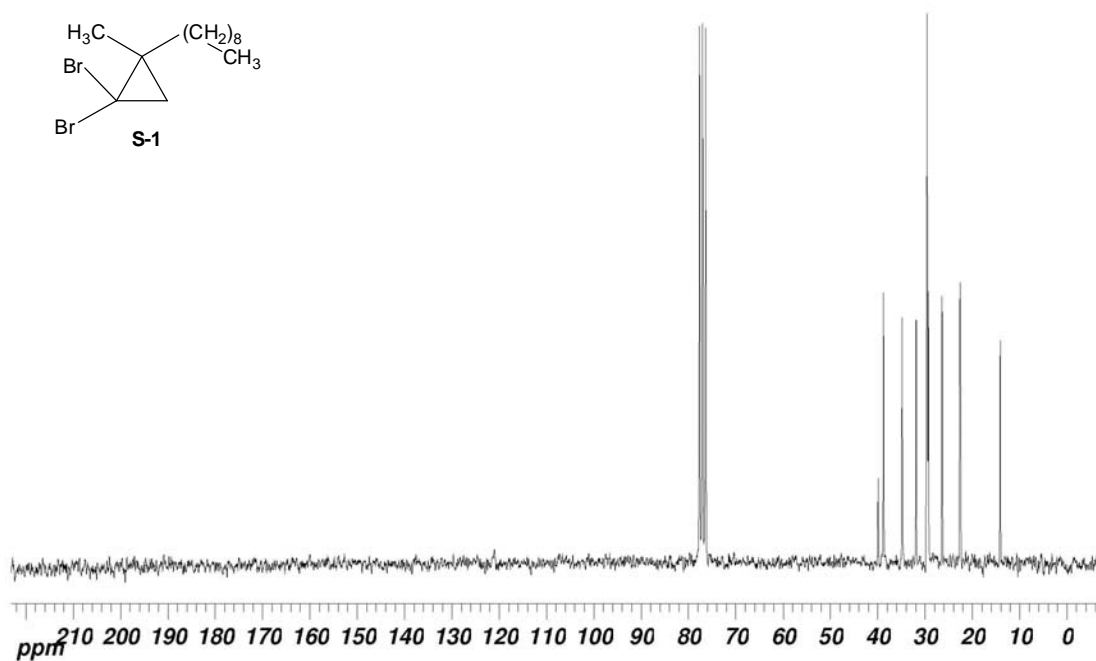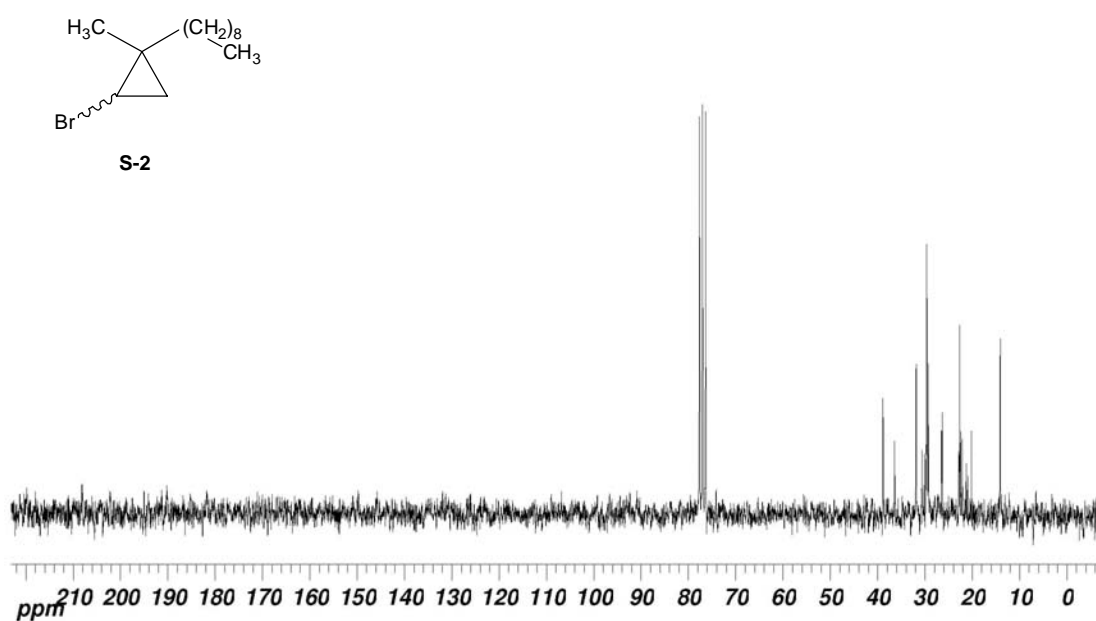

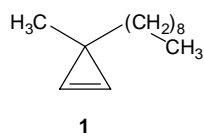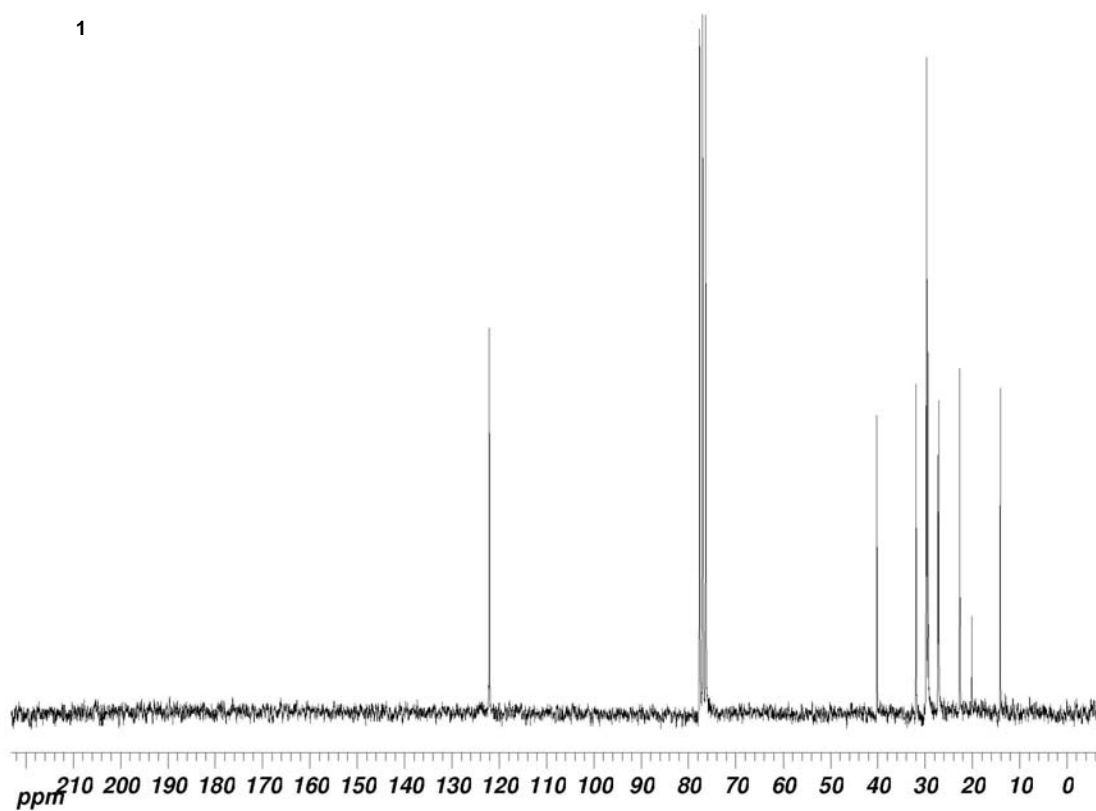

pegca027  
13C 100.6MHz Job 17583 Glen P E A027 CDCl3 25.0°C 1 hour 27 min

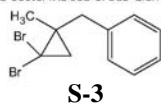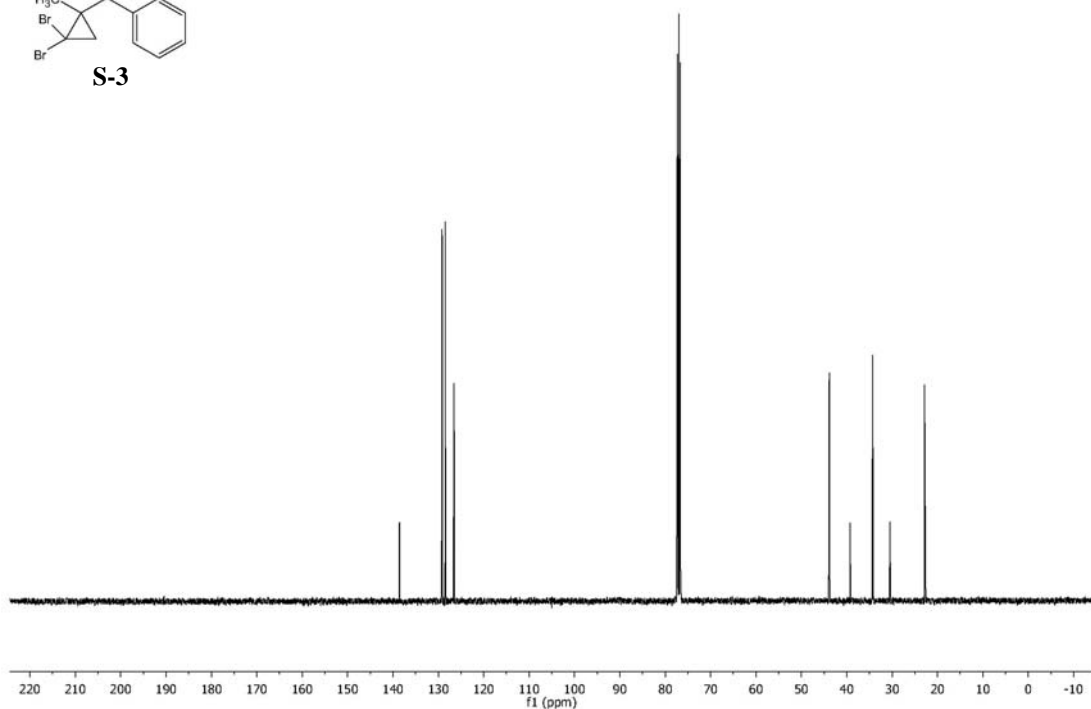

S4

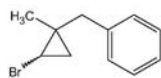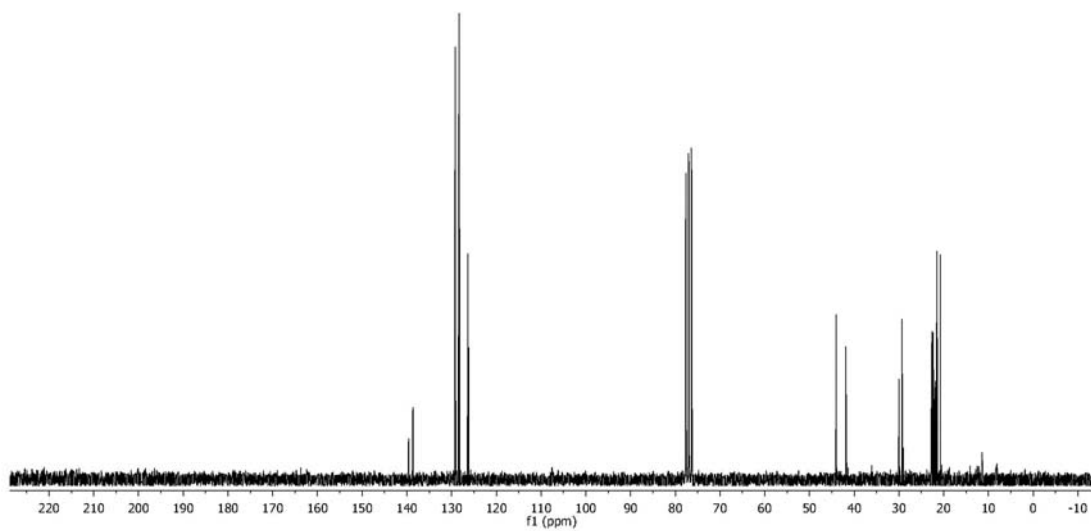

6

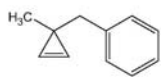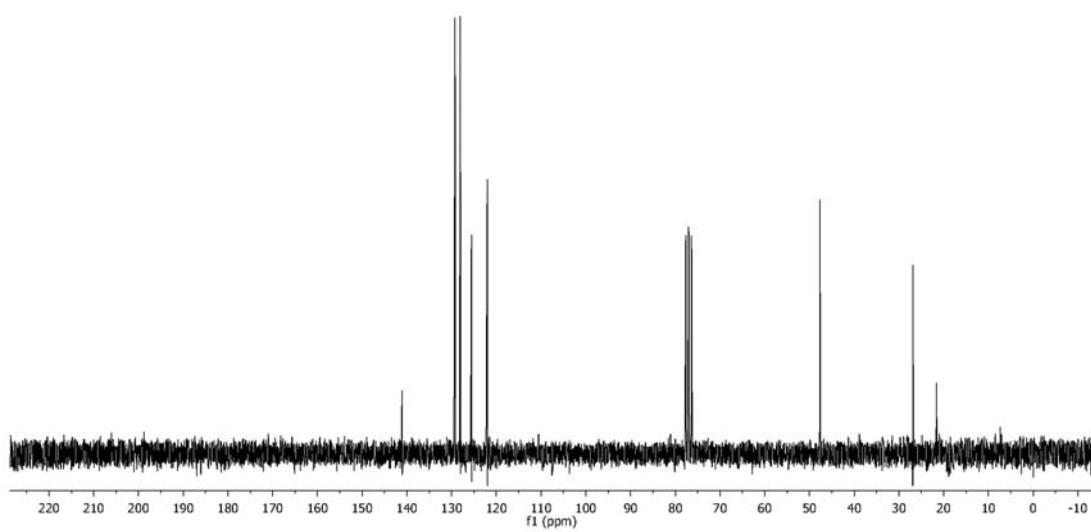



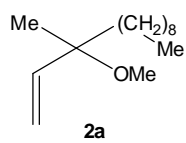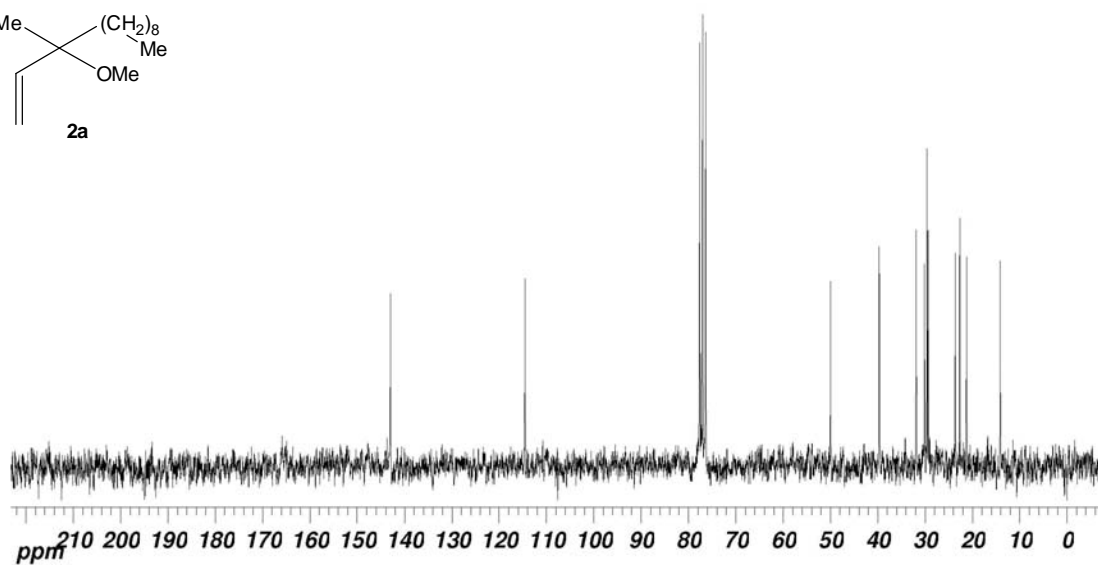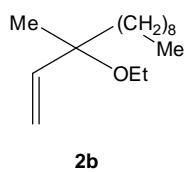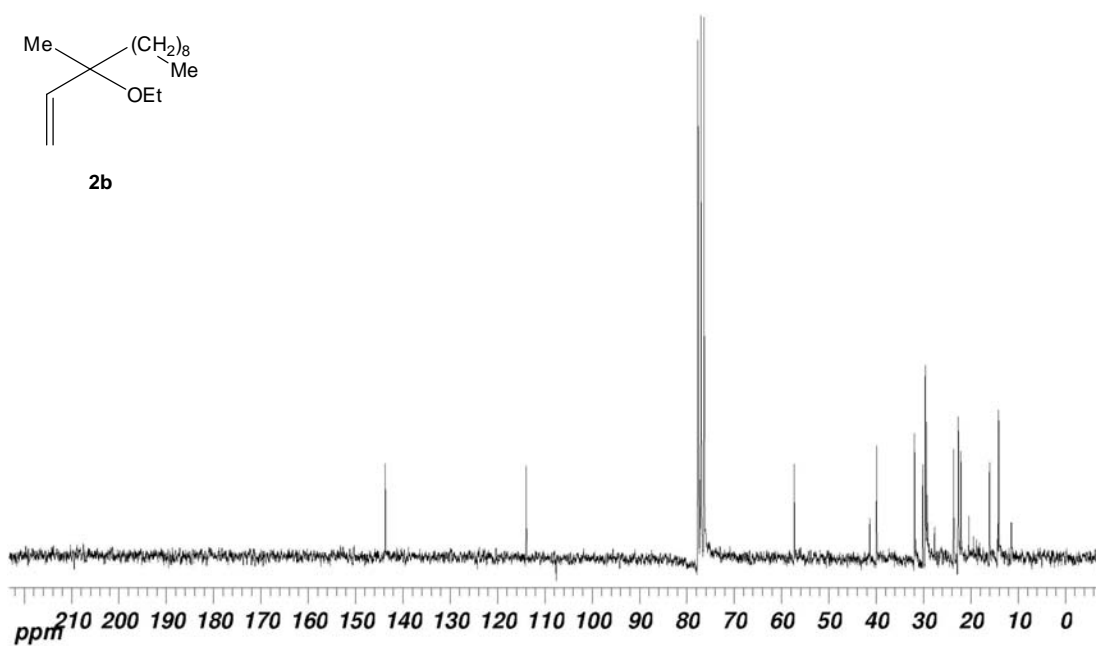

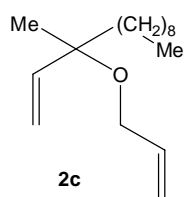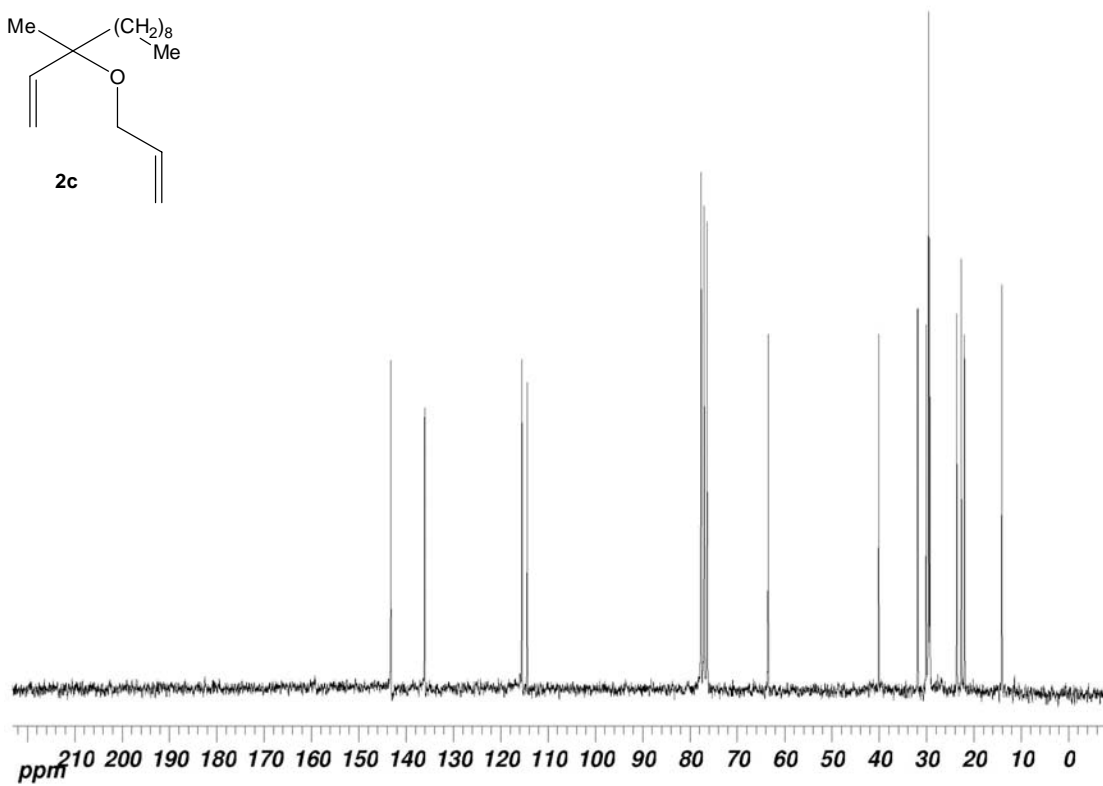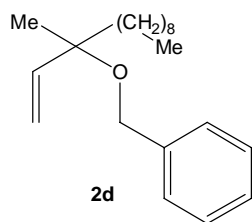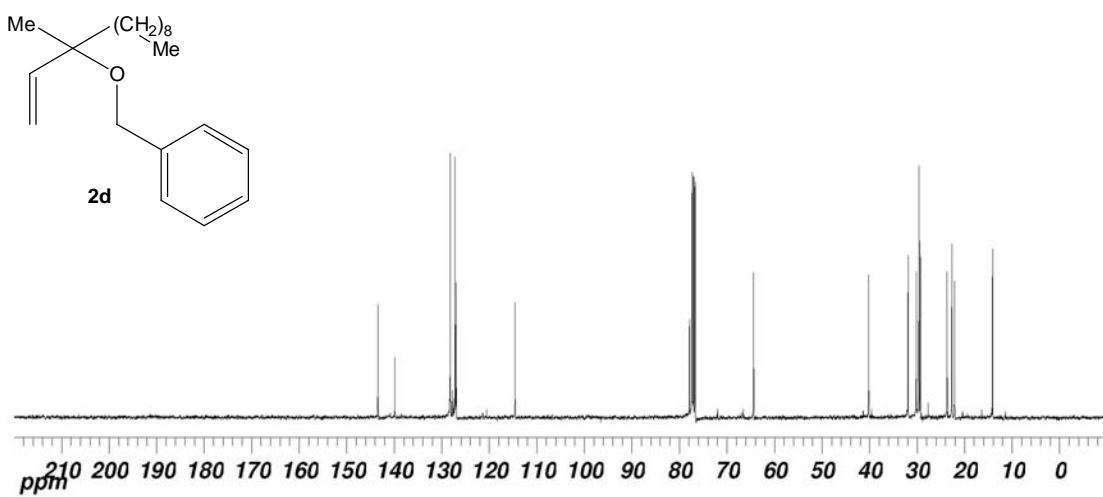

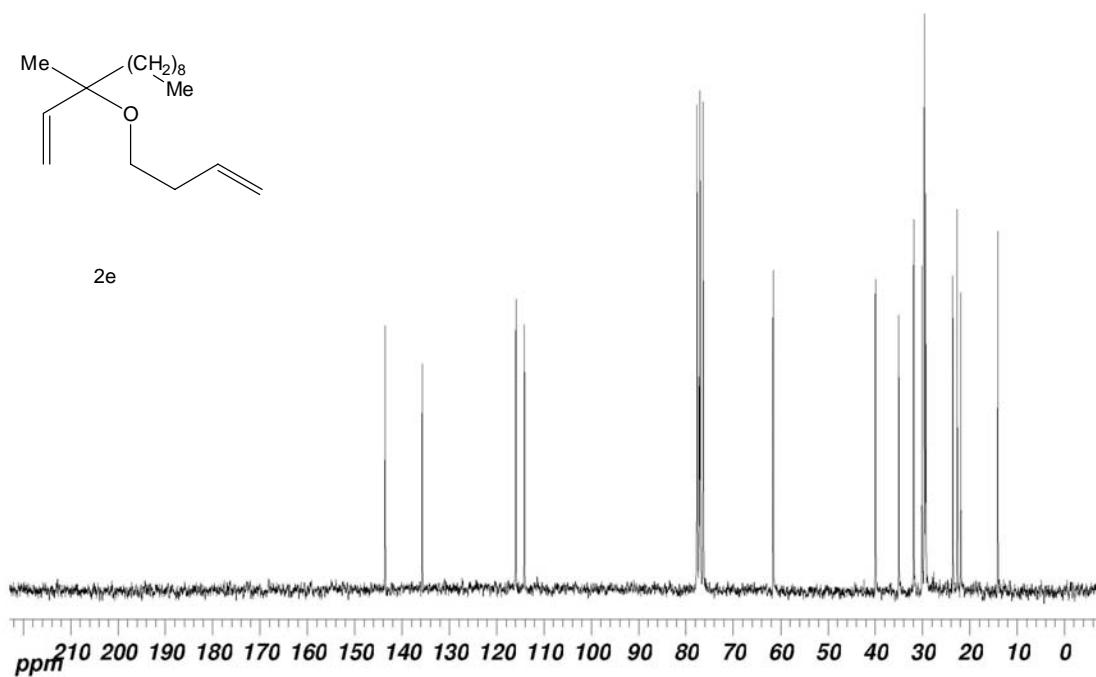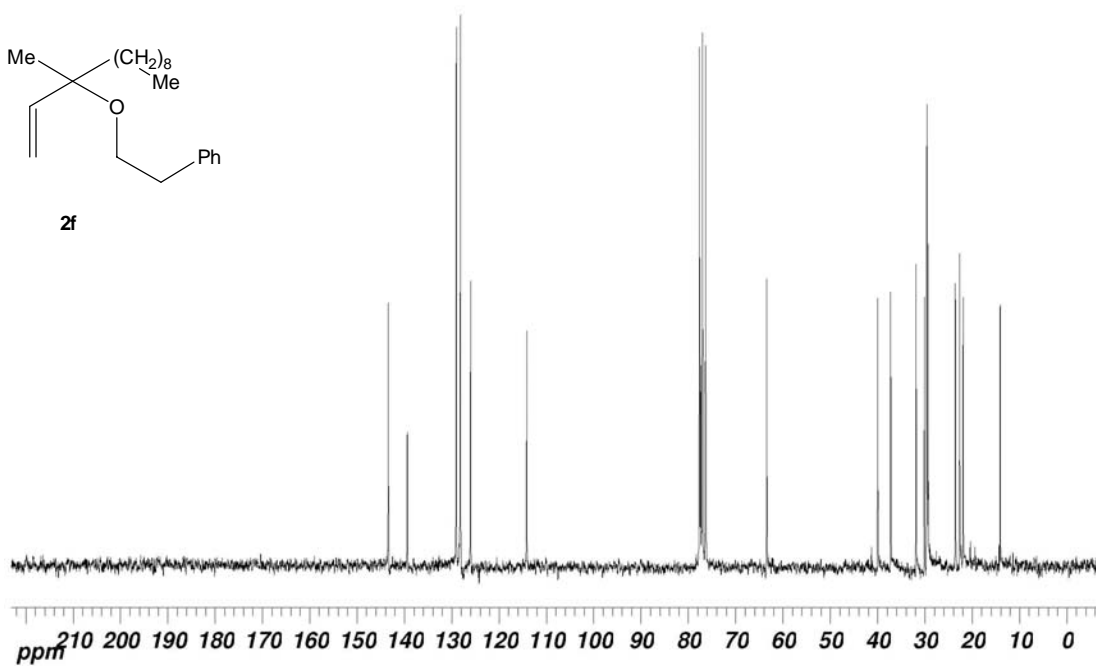

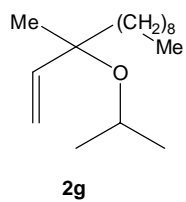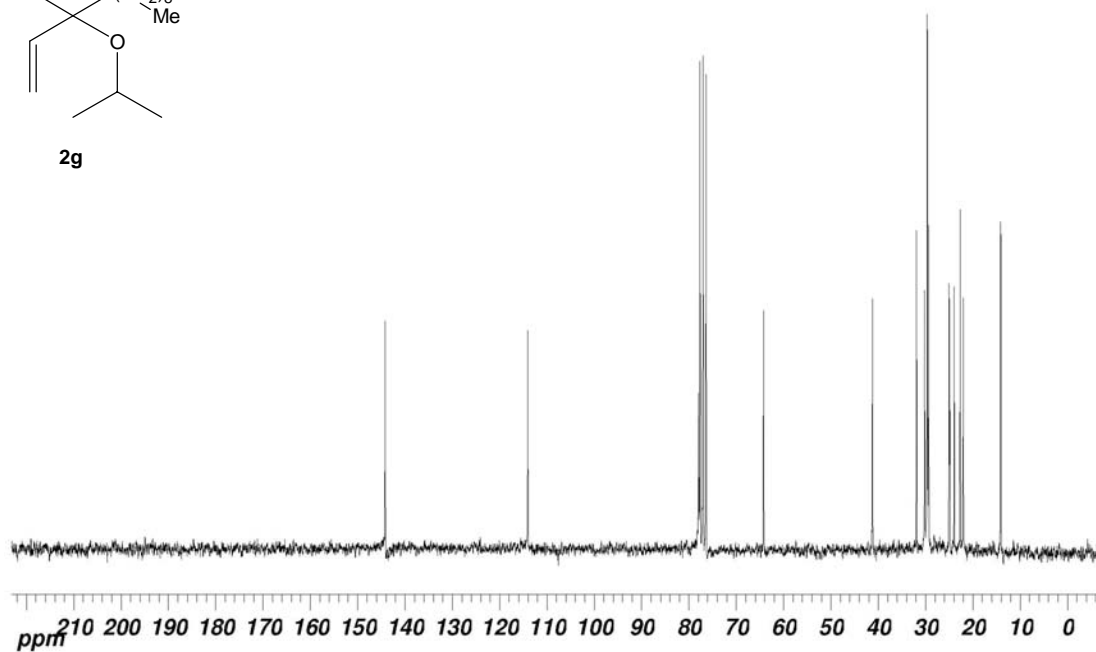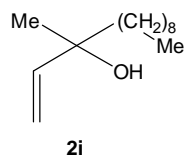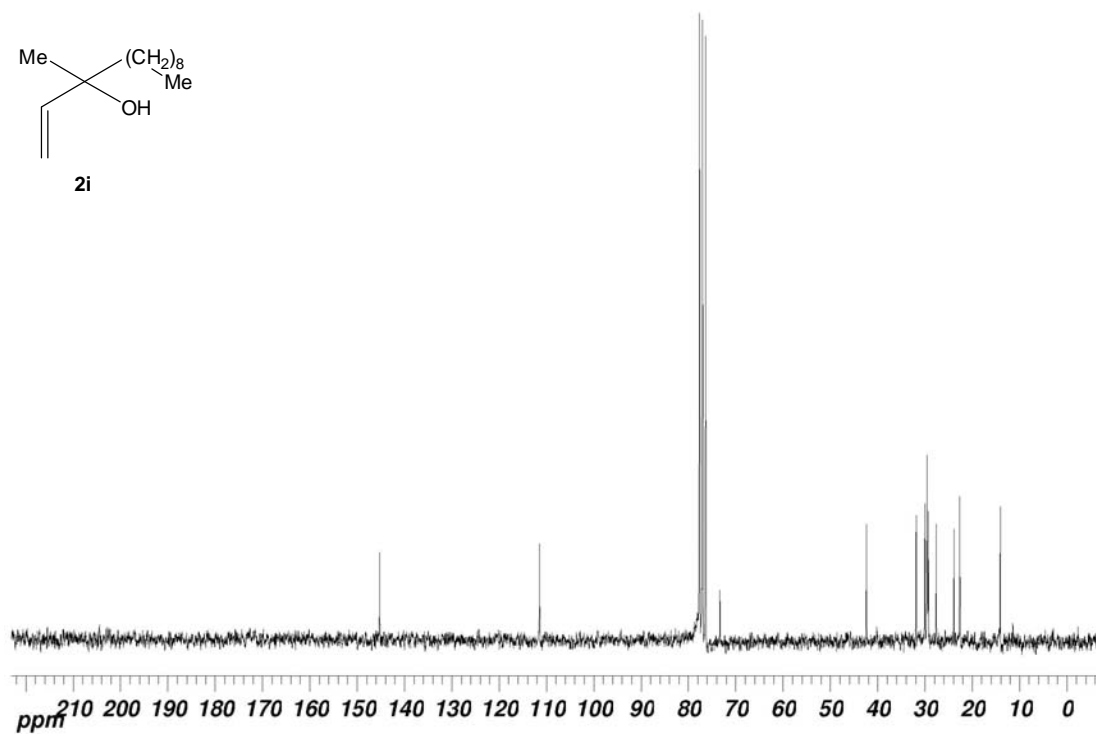

mshcb696  
13C 100.6MHz Job 17555 Hadfield M S B696 CDCl3 25.0°C 0 hour 14 min

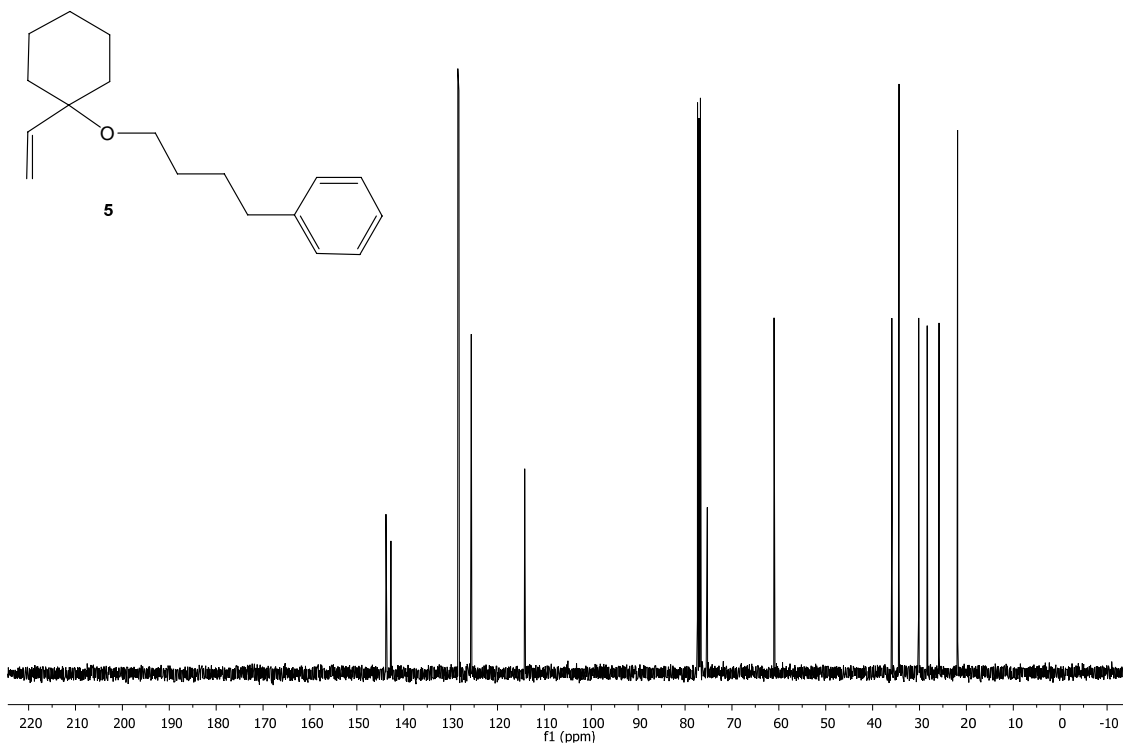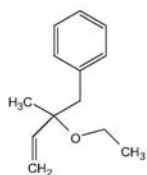

**7**

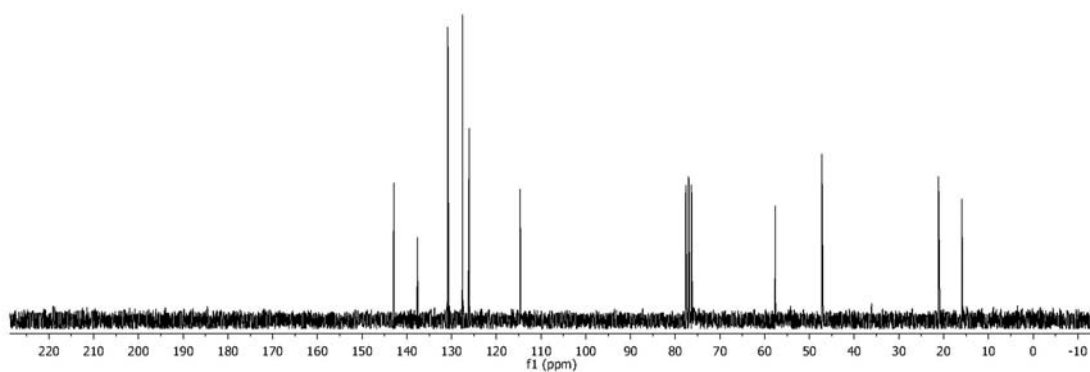

8

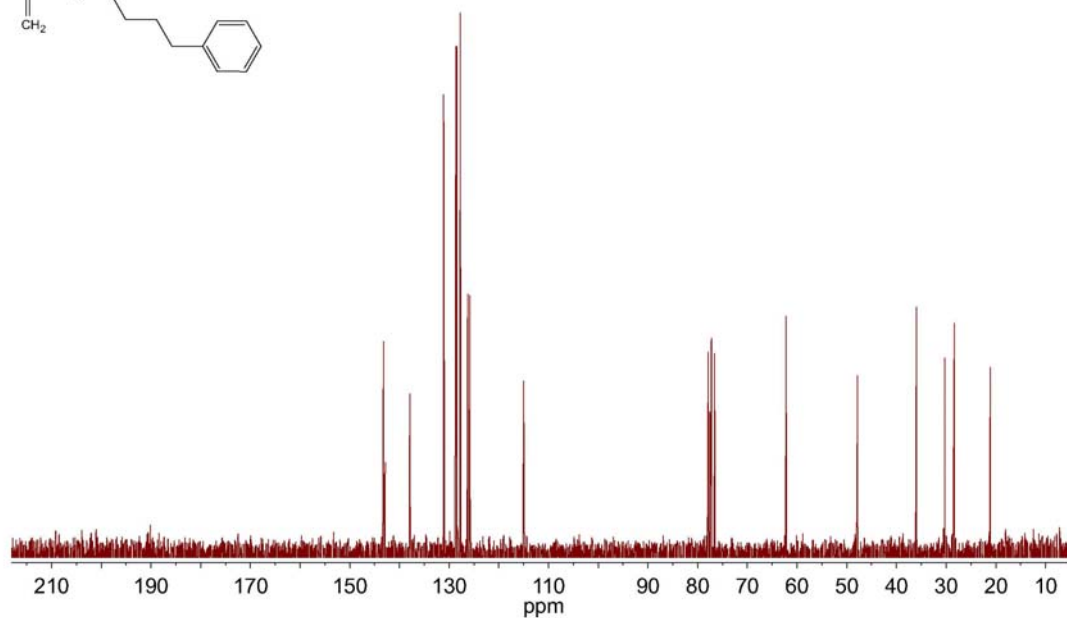

10

mshca687  
13C 100.6MHz Job 17547 Hadfield M S A687 CDCl3 25.0C 1 hour 27 min

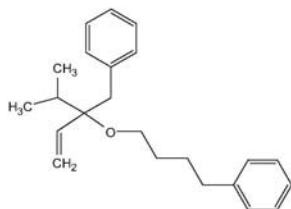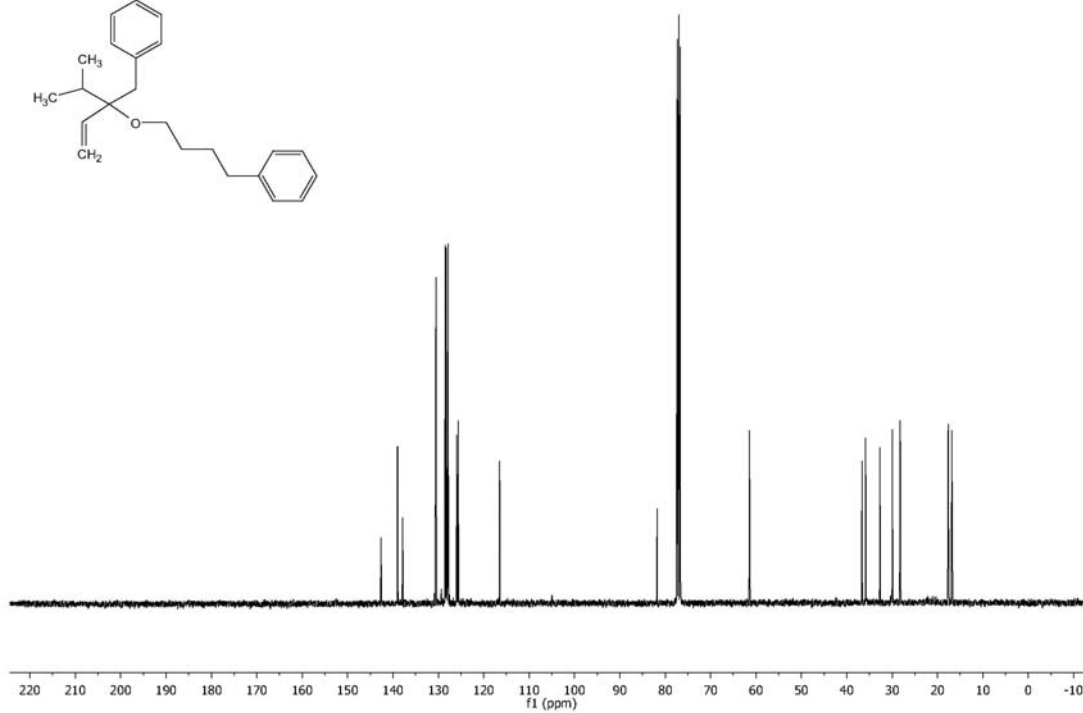

**13**

mshcf697  
13C 100.6MHz Job 17618 Hadfield M S F697 CDCl3 25.0°C 16 hours 2 min

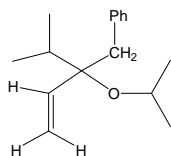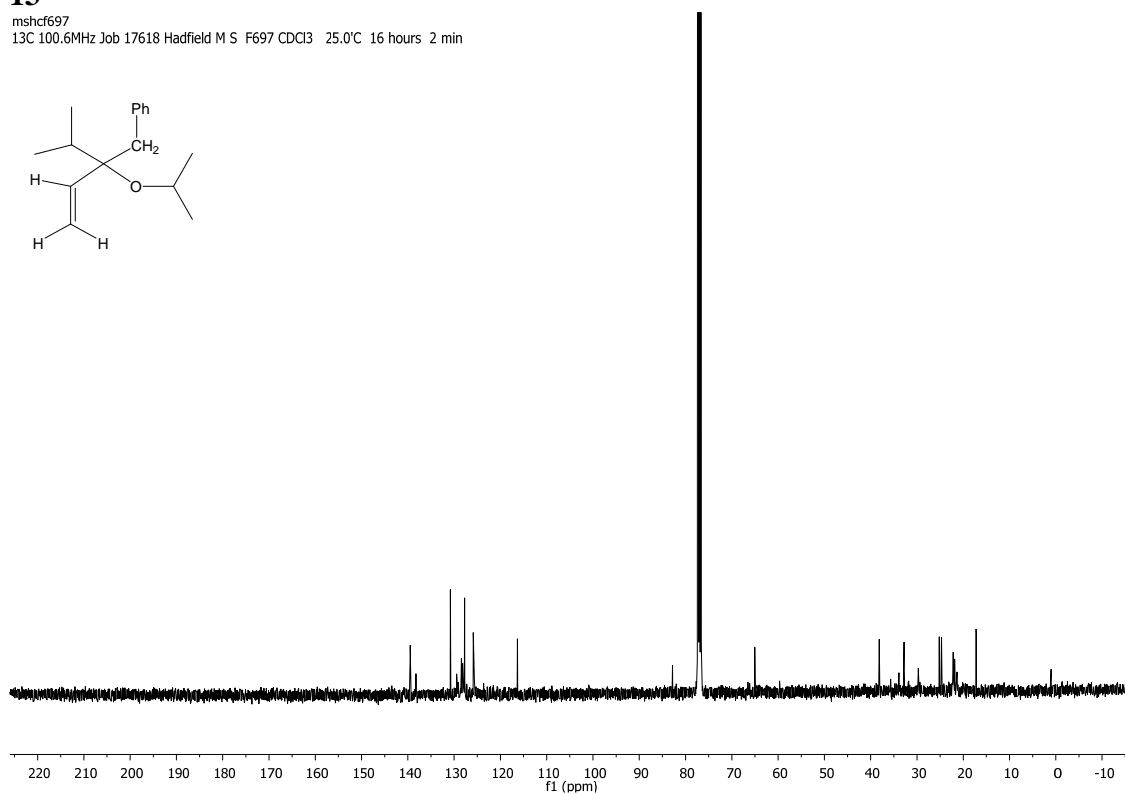

**15**

mshcd705  
13C 100.6MHz Job 17724 Hadfield M S D705 CDCl3 25.0°C 8 hours 15 min

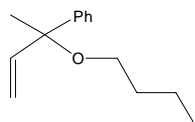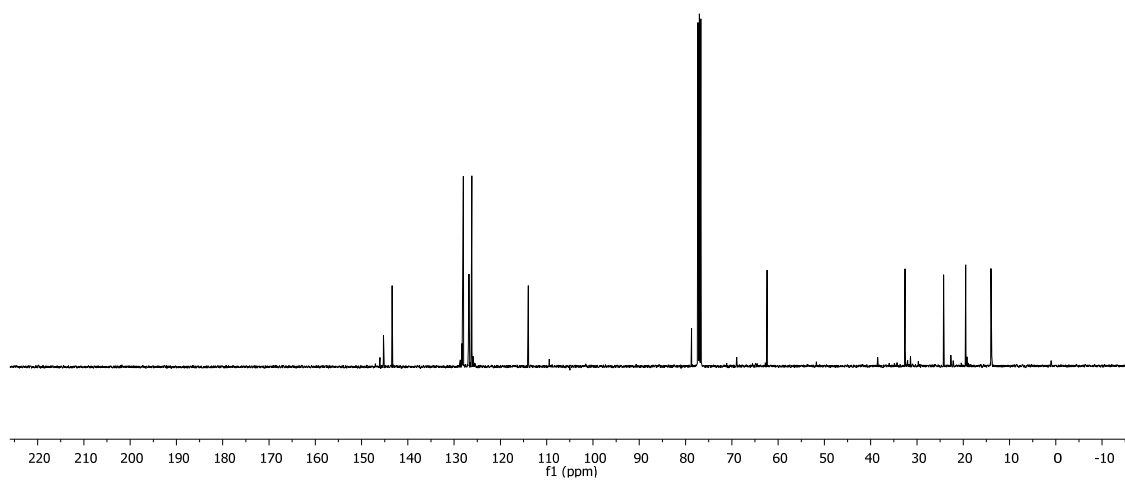

16

mshcc703  
13C 100.6MHz Job 17682 Hadfield M S C703 CDCl3 25.0°C 5 hours 6 min

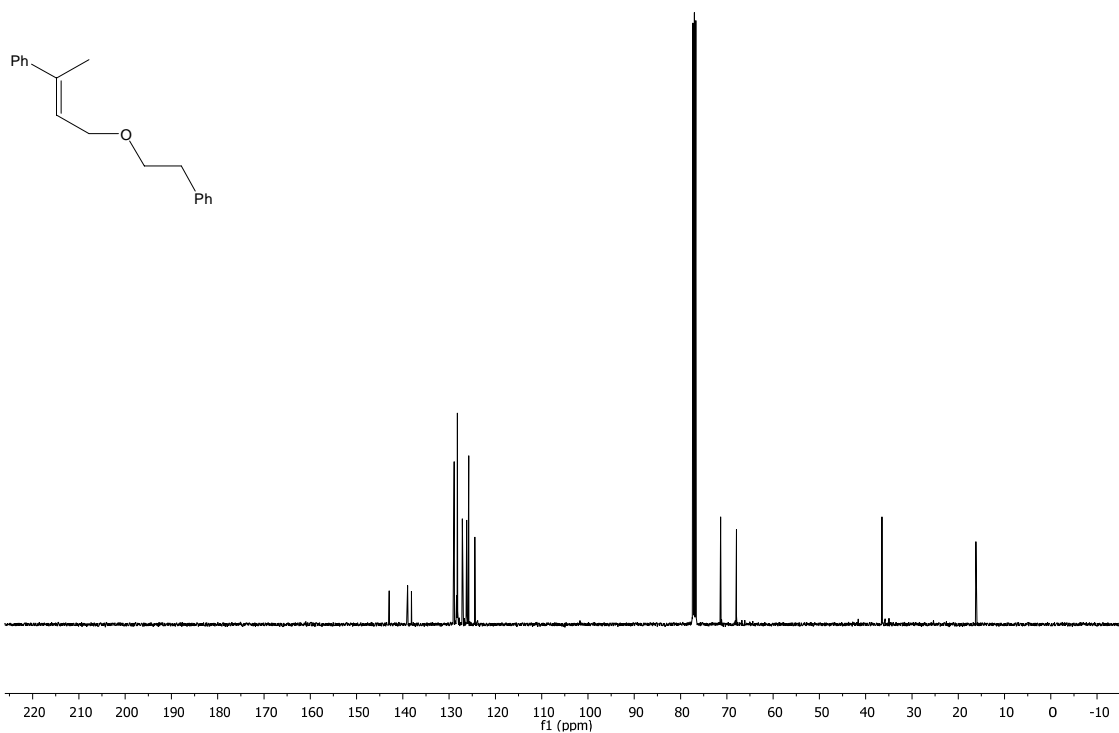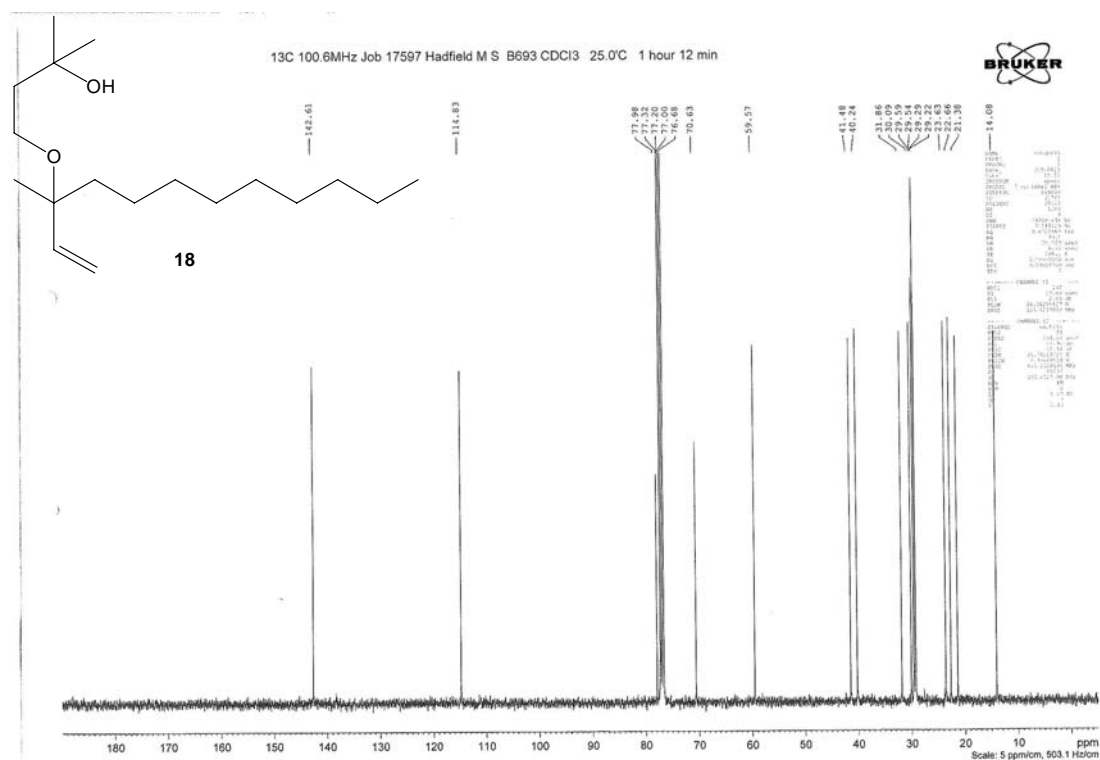



mshcb704  
13C 100.6MHz Job 17667 Hadfield M S B704 CDCl3 25.0°C 2 hours 25 min

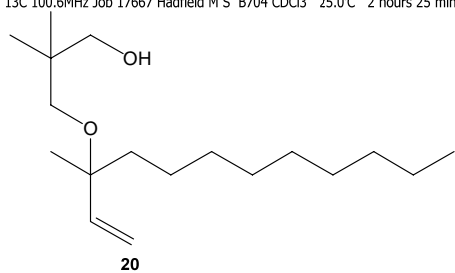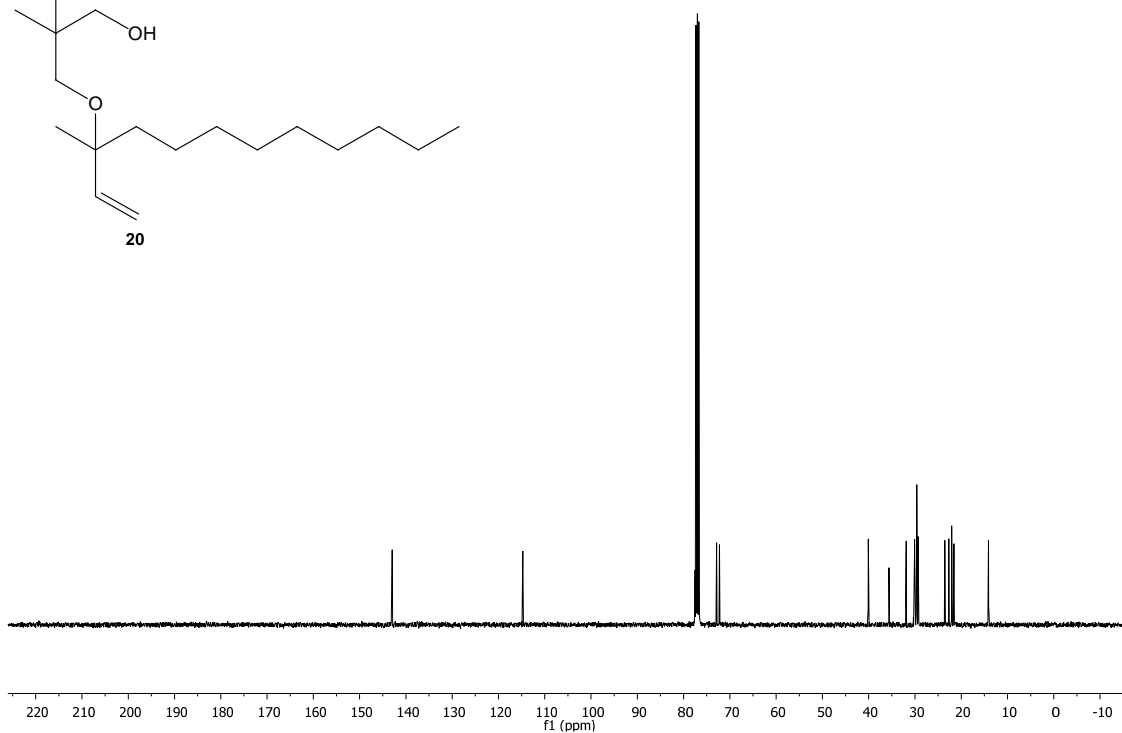

mshcb688  
13C 100.6MHz Job 17460 Hadfield M S B688 CDCl3 25.0°C 1 hour 42 min

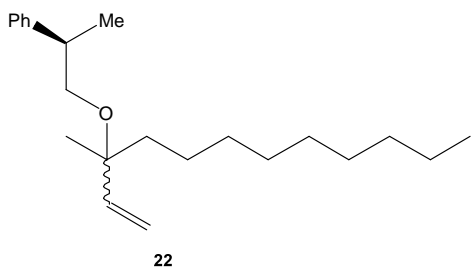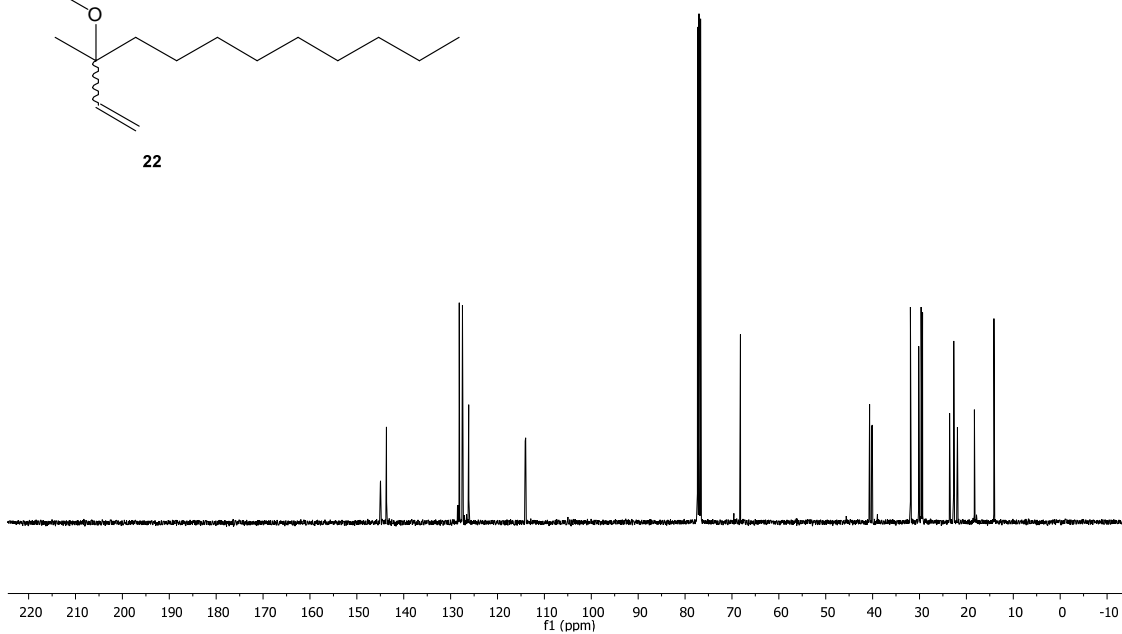

24

mshca708  
13C 100.6MHz Job 17687 Hadfield M S A708 CDCl3 25.0°C 4 hours 37 min

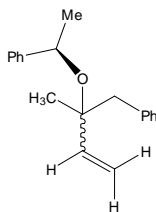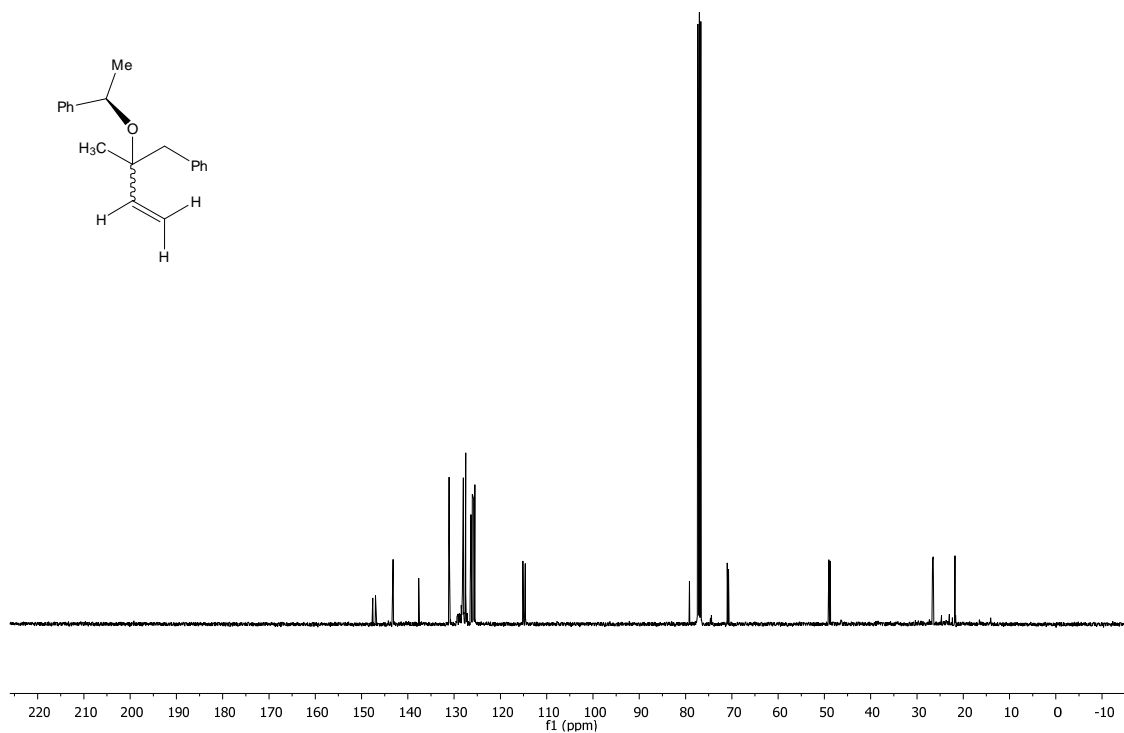

## 5. References

- 1) M. Rubin, V. Gevorgyan, *Synthesis*, 2004, **5**, 796.
- 2) M. Rubin, M. Rubina, V. Gevorgyan, *Synthesis*, 2006, **8**, 1221.
- 3) J. T. Bauer, M. S. Hadfield and A.-L. Lee, *Chem. Commun.*, 2008, 6405.
- 4) R. E. Giudici, A.H. Hoveyda, *Am. Chem. Soc.*, 2007, **129**, 3824
- 5) M. A. Smith, H. G. Richey, *Organometallics*, 2007, **26**, 609
